1 **Large-scale identification of ubiquitination sites on**  
2 **membrane-associated proteins in *Arabidopsis***  
3 ***thaliana* seedlings**  
4  
5

6 Lauren E. Grubb<sup>1,2,\*</sup>, Paul Derbyshire<sup>2</sup>, Katherine Dunning<sup>1</sup>, Cyril Zipfel<sup>2,3</sup>, Frank L.H.  
7 Menke<sup>2,\*</sup>, and Jacqueline Monaghan<sup>1,2,\*</sup>  
8  
9

10  
11 <sup>1</sup>Department of Biology, Queen's University, Kingston, Canada

12 <sup>2</sup>The Sainsbury Laboratory, University of East Anglia, Norwich Research Park,  
13 Norwich, United Kingdom

14 <sup>3</sup>Department of Plant and Microbial Biology, Zurich-Basel Plant Science Center,  
15 University of Zurich, Zurich, Switzerland  
16  
17  
18

19 <sup>+</sup>Current address: John Innes Centre, Norwich Research Park, Norwich, United  
20 Kingdom  
21  
22  
23

24 \*Corresponding authors: [frank.menke@tsl.ac.uk](mailto:frank.menke@tsl.ac.uk)  
25 [jacqueline.monaghan@queensu.ca](mailto:jacqueline.monaghan@queensu.ca)  
26  
27  
28  
29  
30  
31

## 32 **Abstract**

33 Protein phosphorylation and ubiquitination are two of the most abundant forms of  
34 post-translational modifications in eukaryotes, regulated by thousands of protein  
35 kinases, phosphatases, E3 ubiquitin ligases, and ubiquitin proteases. Although  
36 previous studies have catalogued several ubiquitinated proteins in plants (Walton et  
37 al., 2016), few membrane-localized proteins have been identified. Receptor kinases  
38 (RKs) initiate phosphorylation signal relays that regulate plant growth, development,  
39 and stress responses. While the regulatory role of phosphorylation on protein kinase  
40 function is well-documented (Couto and Zipfel, 2016), considerably less is known  
41 about the role of ubiquitination on protein kinase function, even though protein  
42 turnover is critical to their signaling competence and cellular homeostasis. Here we  
43 describe the large-scale identification of ubiquitination sites on Arabidopsis proteins  
44 associated with or integral to the plasma membrane, including over 100 protein  
45 kinases.

## 46 47 **Introduction**

48 Proteins can be mono-, poly-, and/or multi-mono-ubiquitinated, each affecting protein  
49 function in different ways. For example, mono-ubiquitination is often associated with  
50 protein activation or endocytosis, whereas poly-ubiquitination is often a mark for  
51 proteasomal degradation (Vierstra, 2012; Paez Valencia et al., 2016). Dynamic  
52 interplay between phosphorylation and ubiquitination has been observed in several  
53 proteins involved in immune signaling (Mithoe and Menke, 2018), including layered  
54 post-translational regulation of the receptor-like cytoplasmic kinase (RLCK) BIK1.  
55 BIK1 is directly phosphorylated and activated by several ligand-bound RKs (Couto  
56 and Zipfel, 2016), and can be dephosphorylated by the phosphatase PP2C38 (Couto

Grubb LE et al. Main Text.

57 et al., 2016). Precise control of BIK1 abundance is regulated by poly-ubiquitination  
58 by the E3 ligases PUB25 and PUB26 (Wang et al., 2018), as well as phosphorylation  
59 by the calcium-dependent protein kinase CPK28 (Monaghan et al., 2014; Wang et  
60 al., 2018) and the mitogen-activated protein kinase kinase kinase kinase (MAP4K)  
61 SIK1/MAP4K4 (Zhang et al., 2018; Jiang et al., 2019). Most recently, it was shown  
62 that BIK1 is also mono-ubiquitinated by the E3 ligases RHA3A and RHA3AB to  
63 regulate its activation and endocytosis (Ma et al., 2020).

64

## 65 **Results and Discussion**

66 Proteomics and mutagenesis approaches have resulted in the discovery of several  
67 phosphorylated residues on BIK1 (Liang and Zhou, 2018). To help us understand the  
68 role of ubiquitination on BIK1 function, we set out to identify *in vivo* ubiquitination  
69 sites on BIK1. We enriched for plasma membrane-localized BIK1 by isolating  
70 microsomal protein fractions from *Col-0/pBIK1:BIK1-HA*, *cpk28-1/pBIK1:BIK1-HA*  
71 and *CPK28-OE1/pBIK1:BIK1-HA* genotypes, which express 100-fold higher levels of  
72 *BIK1* and differentially accumulate BIK1 protein compared to wild-type (Monaghan et  
73 al., 2014). To increase protein abundance and allow us to potentially capture  
74 immune-induced ubiquitination, proteasomal machinery was inhibited with 50  $\mu$ M  
75 MG-132 an hour before treatment with water or 1  $\mu$ M elf18 (an immunogenic peptide  
76 derived from bacterial EF-Tu (Zipfel et al., 2006)). Microsomal protein fractions were  
77 digested with trypsin, and anti-K- $\epsilon$ -GG agarose beads (Udeshi et al., 2013) were  
78 used to enrich ubiquitinated peptides by affinity binding. Ubiquitinated lysines were  
79 identified based on a shift of  $\sim$ 114 Da - the mass of two glycine remnants that remain  
80 covalently bound to lysines following trypsin digestion - using liquid chromatography  
81 followed by tandem mass spectrometry (LC-MS/MS) (Supplementary Methods).

Grubb LE et al. Main Text.

82           We confidently identified a total of 916 ubiquitinated peptides on 450 proteins  
83 across several biological replicates with a peptide false discovery rate of 0.025  
84 (Table S1), and an additional 526 peptides on 398 proteins observed in single  
85 experiments (Table S2). Included in these data were seven ubiquitinated lysines on  
86 BIK1 (Tables 1, S1, S2, and Figure 1). Given our particular interest in BIK1, we  
87 manually inspected all spectra mapping to BIK1 and found an additional three sites  
88 (Figures 1 and S1), altogether corroborating five of the ubiquitinated residues  
89 reported by (Ma et al., 2020) and revealing five novel ones (Figure 1). Thus, BIK1 is  
90 ubiquitinated on multiple surface-exposed lysines *in vivo*: three in the N-terminal  
91 variable domain (K31, K41, K61), seven in the canonical kinase domain (K95, K106,  
92 K155, K170, K186, K286, K337), and five in the C-terminal region (K358, K366,  
93 K369, K374, K388) (Figure 1). Whether RHA3A/B and PUB25/26 compete for these  
94 sites or ubiquitinate distinct lysines remains to be tested experimentally, as does  
95 clarifying which E2 conjugating enzymes work with respective E3 ligases to catalyze  
96 these events (Turek et al., 2018). Furthermore, as the phospho-status of BIK1 has  
97 been shown to affect its regulation by both RHA3A/B and PUB25/26 (Wang et al.,  
98 2018; Ma et al., 2020), another challenge will be resolving the biochemical  
99 mechanisms underlying this interplay.

100           Analysis of gene ontology (GO) terms associated with proteins identified in  
101 the high-confidence dataset (Table S1) indicated an enrichment of proteins localized  
102 to the 'plasma membrane' ( $p=1.53 \times 10^{-114}$ ) (Table S3). Because we analysed the  
103 samples in the mass spectrometer in data-dependent mode, without quantification,  
104 we are unable to comment on differences between genotypes or immune treatments.  
105 Therefore, any immune-triggered events must be corroborated experimentally.  
106 Multiple sequence alignments of peptides spanning -10 to +10 amino- and carboxyl-

Grubb LE et al. Main Text.

107 terminal to the modified lysines indicated very little consensus and no significant  
108 motifs (Figure S2). Unlike other post-translational modifications, the ubiquitination  
109 reaction requires coordination between E1 activating, E2 conjugating, and E3 ligase  
110 enzymes (Vierstra, 2012). While it may be possible for individual E2-E3 pairs to  
111 exhibit residue-level specificity on their target proteins, data from multiple species  
112 suggests that surface-availability may be the only unifying feature of ubiquitinated  
113 residues (Danielsen et al., 2011).

114 We identified ubiquitinated peptides mapping to proteins from diverse families,  
115 including aquaporins, H<sup>+</sup> and Ca<sup>2+</sup> ATPases, remorins, several classes of  
116 transporters, cellulose synthases, and others (Tables S1 and S2). Comparison  
117 between our dataset and 8 published Arabidopsis ubiquitome datasets, as well as  
118 manual inspection of the literature, revealed 265 novel ubiquitin targets (Table S4).  
119 We noted that molecular function GO terms 'protein modification' ( $p=1.79 \times 10^{-12}$ ),  
120 'phosphorylation' ( $p=2.15 \times 10^{-26}$ ), and 'response to stimulus' ( $p=6.44 \times 10^{-21}$ ) were  
121 particularly enriched in our dataset (Table S3). Interestingly, we identified multiple  
122 ubiquitinated lysines on over 70 RKs representing diverse subgroups, including  
123 FLS2, EFR, CERK1, LORE, RLK7, SOBIR1/EVR, LIK1, RKL1, WAK1, WAK2, FER,  
124 ER, BAM1, BAM2, and others (Table 1). We also identified ubiquitination sites on  
125 more than 20 plasma membrane-associated cytoplasmic protein kinases from  
126 several subgroups (Table 1). Because analysis of tryptic peptides with ubiquitinated  
127 lysine residues enriched by anti-K- $\epsilon$ -GG does not allow for discrimination between  
128 mono- or poly-ubiquitination, it is likely that we have captured both degradative and  
129 non-degradative ubiquitination on these protein kinases. Given the broad interest in  
130 phosphorylation-based signal transduction and protein homeostasis, we expect this

Grubb LE et al. Main Text.

131 information will be valuable to the plant research community, and look forward to  
132 future studies that explore the function of these ubiquitination events.

133

## 134 **Footnotes**

135

## 136 **Acknowledgements**

137 We thank Jan Sklenar for helpful suggestions and technical assistance, and are  
138 grateful to Melissa Bredow for help using Phyre2 and PyMol. We thank Libo Shan  
139 and Ping He for sharing data prior to publication.

140

## 141 **Funding**

142 This research was funded through a Biotechnology and Biological Sciences  
143 Research Council (BBSRC) Anniversary Future Leader Fellowship (J.M.), a Natural  
144 Sciences and Engineering Research Council of Canada (NSERC) Discovery grant  
145 (J.M.), a John R. Evans Leader's Fund grant from the Canadian Foundation for  
146 Innovation and the Ontario Ministry of Research and Innovation (J.M.), Queen's  
147 University start-up funds (J.M.), a grant from the European Research Council under  
148 the Grant Agreement 309858 (grant "PHOSPHinnATE", C.Z.), and through generous  
149 support of the Gatsby Charitable Foundation (C.Z. and F.L.H.M). L.E.G. and K.D.  
150 were supported by NSERC Canada Graduate Scholarships for Masters students  
151 (CGS-M), NSERC Michael Smith Foreign Study Supplements, and Ontario Graduate  
152 Scholarships (OGS).

153

154 **Author Contributions**

155 F.L.H.M. and J.M. designed the research; L.E.G. and F.L.H.M. performed the  
156 experiments; L.E.G., P.D., K.D., F.L.H.M., and J.M. analyzed the data; C.Z.,  
157 F.L.H.M., and J.M. supervised the work; J.M. wrote the letter with input from all  
158 authors.

159

160 **References**

161 **Couto D, Niebergall R, Liang X, Bücherl CA, Sklenar J, Macho AP, Ntoukakis V,**  
162 **Derbyshire P, Altenbach D, Maclean D, et al** (2016) The Arabidopsis Protein  
163 Phosphatase PP2C38 Negatively Regulates the Central Immune Kinase BIK1.  
164 *PLoS Pathog* **12**: e1005811

165 **Couto D, Zipfel C** (2016) Regulation of pattern recognition receptor signalling in  
166 plants. *Nat Rev Immunol* **16**: 537–552

167 **Danielsen JMR, Sylvestersen KB, Bekker-Jensen S, Szklarczyk D, Poulsen JW,**  
168 **Horn H, Jensen LJ, Mailand N, Nielsen ML** (2011) Mass spectrometric  
169 analysis of lysine ubiquitylation reveals promiscuity at site level. *Mol Cell*  
170 *Proteomics* **10**: M110.003590

171 **Jiang Y, Han B, Zhang H, Mariappan KG, Bigeard J, Colcombet J, Hirt H** (2019)  
172 MAP4K4 associates with BIK1 to regulate plant innate immunity. *EMBO Rep.*  
173 **20**:

174 **Kelley LA, Mezulis S, Yates CM, Wass MN, Sternberg MJE** (2015) The Phyre2  
175 web portal for protein modeling, prediction and analysis. *Nat Protoc* **10**: 845–858

176 **Lal NK, Nagalakshmi U, Hurlburt NK, Flores R, Bak A, Sone P, Ma X, Song G,**  
177 **Walley J, Shan L, et al** (2018) The Receptor-like Cytoplasmic Kinase BIK1  
178 Localizes to the Nucleus and Regulates Defense Hormone Expression during  
179 Plant Innate Immunity. *Cell Host Microbe* **23**: 485–497.e5

180 **Liang X, Zhou J-M** (2018) Receptor-Like Cytoplasmic Kinases: Central Players in  
181 Plant Receptor Kinase-Mediated Signaling. *Annu Rev Plant Biol* **69**: 267–299

182 **Ma X, Claus LAN, Leslie ME, Tao K, Wu Z, Liu J, Yu X, Li B, Zhou J, Savatin DV,**  
183 **et al** (2020) Ligand-induced monoubiquitination of BIK1 regulates plant  
184 immunity. *Nature* **581**: 199–203

185 **Mithoe SC, Menke FL** (2018) Regulation of pattern recognition receptor signalling  
186 by phosphorylation and ubiquitination. *Curr Opin Plant Biol* **45**: 162–170

Grubb LE et al. Main Text.

- 187 **Monaghan J, Matschi S, Shorinola O, Rovenich H, Matei A, Segonzac C,**  
188 **Malinovsky FG, Rathjen JP, MacLean D, Romeis T, et al** (2014) The calcium-  
189 dependent protein kinase CPK28 buffers plant immunity and regulates BIK1  
190 turnover. *Cell Host Microbe* **16**: 605–615
- 191 **Paez Valencia J, Goodman K, Otegui MS** (2016) Endocytosis and Endosomal  
192 Trafficking in Plants. *Annu Rev Plant Biol* **67**: 309–335
- 193 **Shiu S-H, Bleecker AB** (2001) Plant Receptor-Like Kinase Gene Family: Diversity,  
194 Function, and Signaling. *Science Signaling* **2001**: re22–re22
- 195 **Shiu SH, Bleecker AB** (2003) Expansion of the receptor-like kinase/Pelle gene  
196 family and receptor-like proteins in Arabidopsis. *Plant Physiol* **132**: 530–543
- 197 **Turek I, Tischer N, Lassig R, Trujillo M** (2018) Multi-tiered pairing selectivity  
198 between E2 ubiquitin–conjugating enzymes and E3 ligases. *J. Biol. Chem.*
- 199 **Udeshi ND, Mertins P, Svinkina T, Carr SA** (2013) Large-scale identification of  
200 ubiquitination sites by mass spectrometry. *Nat Protoc* **8**: 1950–1960
- 201 **Vierstra RD** (2012) The expanding universe of ubiquitin and ubiquitin-like modifiers.  
202 *Plant Physiol* **160**: 2–14
- 203 **Walton A, Stes E, Cybulski N, Van Bel M, Inigo S** (2016) It’s time for some “site”-  
204 seeing: novel tools to monitor the ubiquitin landscape in Arabidopsis thaliana.  
205 *The Plant*
- 206 **Wang J, Grubb LE, Wang J, Liang X, Li L, Gao C, Ma M, Feng F, Li M, Li L, et al**  
207 (2018) A Regulatory Module Controlling Homeostasis of a Plant Immune  
208 Kinase. *Mol Cell* **69**: 493–504.e6
- 209 **Zhang M, Chiang Y-H, Toruño TY, Lee D, Ma M, Liang X, Lal NK, Lemos M, Lu**  
210 **Y-J, Ma S, et al** (2018) The MAP4 Kinase SIK1 Ensures Robust Extracellular  
211 ROS Burst and Antibacterial Immunity in Plants. *Cell Host Microbe* **24**: 379–  
212 391.e5
- 213 **Zipfel C, Kunze G, Chinchilla D, Caniard A, Jones JDG, Boller T, Felix G** (2006)  
214 Perception of the bacterial PAMP EF-Tu by the receptor EFR restricts  
215 Agrobacterium-mediated transformation. *Cell* **125**: 749–760

216

217

218



## 219 **Tables and Figures**

### 220 **Table 1: Ubiquitinated protein kinases identified in this study.**

221 Proteins matching the gene ontology term “kinase activity” were filtered from  
 222 Supplementary Tables S1 and S2 and classified based on phylogenies presented by  
 223 (Shiu and Bleecker, 2001; Shiu and Bleecker, 2003). \*Residues that are only  
 224 supported by a single observation (Table S2) are indicated by an asterisk and should  
 225 be interpreted with caution. \*\*Residues that were observed only after manual  
 226 inspection of mass spectra matching BIK1 are indicated with two asterisks and  
 227 shown in Supplementary Figure S1.

#### ***Receptor-like protein kinases***

| <b>Protein family</b> | <b>Accession</b> | <b>Protein name</b>                          | <b>K-GG</b>        |
|-----------------------|------------------|----------------------------------------------|--------------------|
|                       | AT1G11300        | EGM1                                         | K514, K527         |
|                       | AT4G27300        | SD1-1                                        | K518*, K550*, K648 |
|                       | AT4G21380        | ARK3/RK3/SD1-8                               | K661               |
| SD-1                  | AT1G11350        | CBRLK1/RKS2                                  | K528               |
|                       | AT1G61550        | S-locus lectin protein kinase family protein | K507               |
|                       | AT1G11330        | RDA2                                         | K529, K542         |
|                       | AT1G61380        | LORE/SD1-29                                  | K493, K506*        |
|                       | AT2G19130        | S-locus lectin protein kinase family protein | K498*, K591        |
| SD-2                  | AT1G34300        | Lectin protein kinase family protein         | K489*, K710        |
|                       | AT4G32300        | SD2-5                                        | K641*, K727        |
|                       | AT4G28350        | LecRK-VII.2                                  | K339               |
| L-LEC                 | AT3G53380        | LecRK-VIII.1                                 | K374               |
|                       | AT2G37710        | RLK/LecRK-IV.1                               | K350*, K370        |

Grubb LE et al. Main Text.

|           |           |                               |                                                              |                        |
|-----------|-----------|-------------------------------|--------------------------------------------------------------|------------------------|
| C-LEC     | AT1G52310 | C-type lectin receptor kinase | K265*, K278*, K292                                           |                        |
|           | AT1G70520 | CRK2                          | K379*                                                        |                        |
|           | AT4G23180 | CRK10/RLK4                    | K438*, K449                                                  |                        |
|           | AT4G23190 | CRK11/RLK3                    | K349, K366, K368, K400*, K451                                |                        |
|           | CRK/DUF26 | AT4G23300                     | CRK22                                                        | K352, K369, K371, K381 |
|           |           | AT4G05200                     | CRK25                                                        | K448, K507             |
|           |           | AT4G11530                     | CRK34                                                        | K363, K399             |
|           | AT4G04570 | CRK40                         | K376*, K402                                                  |                        |
| URK-II    | AT5G20050 | URK-II family protein         | K199*, K156                                                  |                        |
|           | AT5G54380 | THE1                          | K480*, K526, K534, K560*, K657*, K753*                       |                        |
|           | AT3G51550 | FERONIA                       | K530, K534, K549, K561, K672, K759, K771, K773, K781*, K843* |                        |
| CrRLK1L-1 | AT3G46290 | HERK1                         | K479, K498, K501                                             |                        |
|           | AT1G30570 | HERK2                         | K518                                                         |                        |
|           | AT2G23200 | CrRLK1L-1 family protein      | K710                                                         |                        |
|           | AT5G38990 | MDS1                          | K541, K554*, K646*                                           |                        |
|           | AT1G51800 | IOS1                          | K721                                                         |                        |
| LRR-1     | AT1G51890 | LRR-Ia family protein         | K543*                                                        |                        |
|           | AT2G37050 | BSR050                        | K740                                                         |                        |
|           | AT4G33430 | SERK3/BAK1                    | K339*                                                        |                        |
|           | AT2G13800 | SERK5/BAK8                    | K303                                                         |                        |
| LRR-II    | AT5G10290 | LRR-II family protein         | K276, K314, K469                                             |                        |
|           | AT5G16000 | NIK1                          | K320*                                                        |                        |
|           | AT2G23950 | CLERK                         | K317                                                         |                        |

Grubb LE et al. Main Text.

|                    |           |                         |                                                        |
|--------------------|-----------|-------------------------|--------------------------------------------------------|
|                    | AT3G17840 | RLK902                  | K315, K336, K347                                       |
|                    | AT1G48480 | RKL1                    | K353, K506                                             |
|                    | AT5G58300 | LRR-III family protein  | K326*                                                  |
| LRR-III            | AT2G26730 | LRR-III family protein  | K293, K315*, K416                                      |
|                    | AT2G36570 | PXC1                    | K319                                                   |
|                    | AT3G08680 | LRR-III family protein  | K407                                                   |
|                    | AT5G16590 | LRR1                    | K317                                                   |
| STUBBELIG-receptor | AT1G53730 | SRF6                    | K392*                                                  |
|                    | AT3G14350 | SRF7                    | K322                                                   |
|                    | AT4G22130 | SRF8                    | K344*, K353                                            |
| LRR-VI             | AT5G63410 | LRR-VI family protein   | K397, K427                                             |
|                    | AT2G02780 | LRR-VI family protein   | K403*                                                  |
| LRR-VII            | AT3G28040 | LRR-VIIa family protein | K742, K728                                             |
|                    | AT1G80870 | LRR-VIIa family protein | K89                                                    |
| LRR-VIII           | AT5G49760 | HPCA                    | K600*, K605, K625, K685*                               |
|                    | AT3G14840 | LIK1                    | K666, K677, K688*, K700, K774, K793, K808, K821, K963* |
| LRR-IX             | AT1G66150 | TMK1                    | K640, K746                                             |
|                    | AT2G01820 | TMK3                    | K601, K637*, K743, K812                                |
|                    | AT3G23750 | BARK1                   | K736*                                                  |
| LRR-X              | AT5G48380 | BIR1                    | K354, K562                                             |
|                    | AT3G28450 | BIR2                    | K290, K514                                             |
| LRR-V              | AT5G42440 | LRR-Xb family protein   | K109                                                   |
|                    | AT2G01820 | PSKR1                   | K757*                                                  |
| LRR-XI             | AT5G65700 | BAM1                    | K785                                                   |

Grubb LE et al. Main Text.

|               |           |                                    |                                |
|---------------|-----------|------------------------------------|--------------------------------|
|               | AT3G49670 | BAM2                               | K781, K914                     |
|               | AT1G28440 | HSL1                               | K845, K957*                    |
|               | AT1G09970 | RLK7/LRR XI-23                     | K689, K703*, K818, K904, K966* |
|               | AT2G33170 | LRR XI family protein              | K835*                          |
|               | AT5G25930 | LRR XI family protein              | K701*, K941*                   |
|               | AT1G72180 | LRR XI family protein              | K704*                          |
| LRR-XII       | AT5G20480 | EFR                                | K999, K1004                    |
|               | AT5G46330 | FLS2                               | K924, K940                     |
| LRR-XIII      | AT1G27190 | BIR3                               | K339                           |
|               | AT1G31420 | FEI1                               | K358                           |
|               | AT4G08850 | MIK2/BSR850                        | K770, K788, K793, K803, K818   |
|               | AT2G26330 | ERECTA                             | K668                           |
| LRR-XV        | AT3G02130 | RPK2/TOAD2/CLI1                    | K1144                          |
| LRR-other     | AT2G31880 | SOBIR1/EVR                         | K640*                          |
| LysMa         | AT3G21630 | CERK1                              | K452                           |
| LRK10L-1a     | AT1G25390 | LRK10L4                            | K309                           |
| CRINKLY4-Like | AT5G46080 | Protein kinase superfamily protein | K293                           |
|               | AT3G55950 | CCR3                               | K514                           |
| RKF3-Like     | AT1G11050 | Protein kinase superfamily protein | K449                           |
| WAK-Like      | AT1G21250 | WAK1/PRO25                         | K403, K425, K437               |
|               | AT1G21270 | WAK2                               | K420, K432, K668*              |
|               | AT2G23450 | WAKL family protein                | K653*                          |
| Phototropin   | AT3G45780 | PHOT1/NPH1/RPT1                    | K526, K899                     |

Grubb LE et al. Main Text.

### ***Cytoplasmic protein kinases***

| <b>Protein family</b> | <b>Accession</b> | <b>Protein name</b>    | <b>K-GG</b>                                                      |
|-----------------------|------------------|------------------------|------------------------------------------------------------------|
| RLCK-V                | AT3G59110        | RLCK-V family protein  | K206                                                             |
|                       | AT2G39660        | BIK1                   | K31*,K41, K61, K155**, K337*, K358*, K366**, K369**, K374*, K388 |
|                       | AT2G17220        | PBL32/KIN3             | K99, K242, K347                                                  |
| RLCK-VII              | AT5G13160        | PBS1                   | K204                                                             |
|                       | AT5G18610        | PBL27                  | K201                                                             |
|                       | AT5G03320        | PBL40                  | K115*                                                            |
|                       | AT1G06700        | PTI1-1                 | K71                                                              |
|                       | AT2G30740        | PTI1-2                 | K38, K74                                                         |
| RLCK-VIII             | AT3G59350        | PTI1-3                 | K116, K133                                                       |
|                       | AT2G47060        | PTI1-4                 | K46, K303*                                                       |
|                       | AT3G17410        | PTI1-7/CARK1           | K89, K190, K299                                                  |
|                       | AT4G35230        | BSK1                   | K85                                                              |
|                       | AT4G00710        | BSK3                   | K67, K481*                                                       |
| RLCK-XII              | AT5G59010        | BSK5                   | K64*                                                             |
|                       | AT3G54030        | BSK6                   | K65                                                              |
|                       | AT1G63500        | BSK7                   | K68*, K105, K304*                                                |
| RLCK-XV               | AT1G52540        | RLCK-XV family protein | K249*                                                            |
| PERK                  | AT3G24550        | PERK1                  | K303                                                             |
|                       | AT4G32710        | PERK14                 | K18*                                                             |
|                       | AT3G20410        | CPK9                   | K71, K115, K427                                                  |
| CDPK                  | AT4G04720        | CPK21                  | K84, K526*                                                       |
|                       | AT5G66210        | CPK28                  | K25, K34, K48*, K97, K108, K206*, K217, K351, K401*,             |

Grubb LE et al. Main Text.

|                      |           |                                                          |             |
|----------------------|-----------|----------------------------------------------------------|-------------|
|                      |           |                                                          | K785        |
| MAPK                 | AT3G63260 | MRK1/RAF48                                               | K342        |
|                      | AT1G65950 | Protein kinase superfamily protein                       | K421        |
|                      | AT4G00300 | Fringe-related protein                                   | K775        |
|                      | AT1G56145 | LRR transmembrane protein kinase                         | K725        |
|                      | AT3G27560 | ATN1                                                     | K44*        |
| Other protein kinase | AT1G03740 | Protein kinase superfamily protein                       | K56*        |
|                      | AT3G25840 | PRP4KA                                                   | K462*       |
|                      | AT4G35500 | Protein kinase superfamily protein                       | K247*       |
|                      | AT5G05200 | Protein kinase superfamily protein                       | K31*        |
|                      | AT5G40540 | Protein kinase superfamily protein                       | K44*        |
|                      | AT5G38480 | GRF3/RC11                                                | K52         |
|                      | AT1G12000 | Phosphofructokinase family protein                       | K23         |
|                      | AT4G21534 | SPHK2                                                    | K49, K59    |
|                      | AT4G09320 | NDPK1                                                    | K106        |
|                      | AT5G50780 | AtMORC4                                                  | K736*, K766 |
| Other kinase         | AT1G12330 | Cyclin-dependent kinase-like protein                     | K184        |
|                      | AT4G36080 | Inositol or phosphatidylinositol kinase                  | K3581*      |
|                      | AT1G20930 | CDKB2;2                                                  | K88*        |
|                      | AT5G26667 | PYR6                                                     | K54*        |
|                      | AT4G29130 | GIN2/HXK1                                                | K117*       |
|                      | AT1G10900 | Phosphatidylinositol-4-phosphate 5-kinase family protein | K28*        |

Grubb LE et al. Main Text.

229

Grubb LE et al. Main Text.

230 **Figure 1: BIK1 is ubiquitinated on multiple lysines *in vivo*.**

231 A comparison between this study and (Ma et al., 2020) indicates that BIK1 is  
232 ubiquitinated on three lysines at its amino (N) terminus, seven in its kinase domain,  
233 and five at its carboxyl (C) terminus. Ubiquitinated lysines identified in (Ma et al.,  
234 2020) are shown in green, those identified in this study are shown in blue, and  
235 residues identified in both studies are magenta. Although the structure of the BIK1  
236 canonical kinase domain was recently solved (Lal et al., 2018), we modelled BIK1 in  
237 Phyre2 (Kelley et al., 2015) in order to include the disordered N- and C-terminal ends  
238 of the protein so that all of the identified sites could be shown in this surface  
239 representation of BIK1 in PyMol.

240

241



Grubb LE et al. Supplemental Data.

## Supplemental Data

Grubb LE, Derbyshire P, Dunning K, Zipfel C, Menke FLH, and Monaghan J.

“Large-scale identification of ubiquitination sites on membrane-associated proteins in

*Arabidopsis thaliana* seedlings”

## Supplemental Methods

The plant genotypes used in this study have been previously described (Monaghan et al., 2014). Twenty mg of seed from each genotype was surface-sterilized using chlorine gas and stratified at 4°C in the dark for 2 days. Seed was then transferred to 250 mL Erlenmeyer flasks containing 50 mL 0.5X Murashige and Skoog (MS) media supplemented with 0.05% sucrose, and shaken at 100 rpm at ambient temperature with a 10h photoperiod for 8 days. Seedlings were incubated with 50 µM MG-132 (Sigma Aldrich, UK) for 1 h with shaking, and then vacuum infiltrated with water (mock) or 1 µM elf18 peptide (EZ Biolabs, USA) for 10 min. Samples were flash frozen and ground to a coarse powder with a mortar and pestle in liquid N<sub>2</sub>, then homogenized in urea lysis buffer (8 M urea, 50 mM Tris-HCl pH 8.0, 150 mM NaCl, 1 mM EDTA, 1 mM P9599 protease inhibitor (Sigma Alrich), 1 mM phenylmethylsulfonyl fluoride (PMSF), 50 µM PR-619 (Sigma Aldrich)) using equal volume-to-tissue ratio in a Potter tube for 10 min at 1,000 rpm. An aliquot of 1 mL was removed and kept for quick analysis of elf18-induced MAPK activation by immunoblot as previously described (Monaghan et al., 2014) (data not shown). The remaining homogenate was centrifuged at 5,856 x g for 1 h at 4°C. The supernatant was transferred to a polycarbonate tube and centrifuged at 110,000 x g for 1 h at 4°C. The pellet was resuspended in 2 mL of lysis buffer with PMSF, and protein concentration was determined using the Bradford Assay according to the manufacturer's instructions (BioRad). Three mg of protein in 2 mL lysis buffer was incubated with 5 mM Tris(2-carboxyethyl)phosphine (TCEP) at ambient temperature for 45 min. Iodoacetamide (10mM) was added, and samples were incubated in the

Grubb LE et al. Supplemental Data.

dark for 30 min at ambient temperature. Finally, samples were diluted to 10 mL in 50 mM Tris-HCl pH 8.0 and digested with 30 µg of trypsin (Pierce, UK) at 30°C overnight.

Following trypsin digestion, samples were acidified with aliquots of 50% trifluoroacetic acid (TFA) to pH 3.0. Precipitate was removed by centrifugation at 1,600 x g, and the peptides in the supernatant were purified using 2.5 mL C18 silica reversed-phase chromatography Sep-Pak columns (Waters). Prior to use, the columns were equilibrated sequentially with 1 column volume (CV) MeOH, then 1 CV activation buffer (80% acetonitrile (ACN), 0.1% TFA), and then 5 CV of wash buffer (2% ACN, 0.1% TFA). Sample was added to the column and allowed to drip by gravity flow, collected, and applied to the column a second time before application of 5 CV wash buffer. Trypsin-digested peptides were eluted in 2 CV elution buffer (40% ACN, 0.1% TFA) and lyophilized.

The PTMScan® Ubiquitin Remnant Motif K-ε-GG antibody (Cell Signaling Technologies, UK) was first crosslinked to the agarose beads by washing each tube 3 times with 1 mL of 100 mM sodium borate pH 9.0, with centrifugation at 2,000 x g between each wash. The beads were then resuspended in 20 mM dimethyl pimelimidate (DMP) crosslinker and 100 mM sodium borate, and incubated for 1 h at room temperature with end-over-end rotation. The beads were washed twice with 1 mL of 200 mM ethanolamine pH 8.0, resuspended in 200 mM ethanolamine, and incubated overnight at 4°C with end-over-end rotation.

Prior to immunoaffinity purification (IP), crosslinked beads were washed 3 times with 1.5 mL IAP buffer (50 mM MOPS pH 7.2, 10 mM sodium phosphate, 50 mM NaCl). Lyophilized peptide samples were resuspended in 1.5 mL IAP buffer,

Grubb LE et al. Supplemental Data.

sonicated for 10 min, and centrifuged at 16,000 x *g* for 5 min. A volume of 1,300  $\mu$ L of peptide sample was added to 300  $\mu$ L of K- $\epsilon$ -GG beads in IAP buffer, and the remaining 200  $\mu$ L was reserved as 'input' sample. The IP was conducted for 2 h at 4°C with end-over-end rotation, followed by centrifugation for 1 min at 2,000 x *g*. The supernatant was kept as the 'unbound' sample to test the efficiency of di-Gly enrichment. Beads were washed twice with 1.5 mL IAP buffer, then 3 times with high performance liquid chromatography (HPLC) grade water prior to elution with 100  $\mu$ L of 0.15% TFA, and centrifugation 1 min at 2,000 x *g*. The supernatant was kept as the 'elution' sample for analysis by LC-MS/MS.

Input, unbound, and elution samples were partially purified using C18 Micro-Spin Stagetips columns (The Nest Group Inc.). The samples were acidified with 50% TFA to a pH of 3.0, and the columns were placed in 2 mL microcentrifuge tubes and equilibrated by washing 3 times with 200  $\mu$ L MeOH and centrifuged at 135 x *g* for 30 s between each wash. Equilibration continued with 3 washes of 200  $\mu$ L equilibration buffer (80% ACN, 0.1% TFA) and centrifugation for 2 min at 185 x *g*, followed by washing 6 times with wash buffer (2% ACN, 0.1% TFA). Peptide solutions were loaded twice into the equilibrated columns and centrifuged for 4 min at 240 x *g*. Columns were then washed 6 times with Wash Buffer as above, followed by tandem elutions in 150  $\mu$ L elution buffer (40% ACN, 0.1% TFA).

To prepare for mass spectrometry, the input, unbound, and eluted samples were dehydrated using vacuum centrifugation (SpeedVac), and then resuspended in 2% ACN and 0.1% Formic Acid (FA), followed by vortexing and sonication for 10 min prior to a final centrifugation at 10,000 x *g* for 10 min. Samples were then loaded into

Grubb LE et al. Supplemental Data.

a 96-well plate for analysis on an Orbitrap Fusion Mass Spectrometer (ThermoFisher).

LC-MS/MS analysis was performed as described in (Bender et al., 2017) with the following modifications. On the Orbitrap Fusion MS/MS spectra were triggered with data dependent acquisition method using 'top 20' and 'most intense ion' settings. Peak lists in Mascot generic file format (.mgf files) were generated from raw files by using the MSConvert package (Matrix Science). Peak lists were searched using Mascot server v.2.4.1 (Matrix Science) against TAIR database (version 10), a separate in-house constructs database, and an in-house contaminants database. Tryptic peptides with up to 2 possible mis-cleavages and charge states +2, +3, +4, were allowed in the search. The following modifications were included in the search: oxidized methionine, diGly on lysine as variable modification and carbamido-methylated cysteine as static modification. Data were searched with a monoisotopic precursor and fragment ions mass tolerance 10ppm and 0.6 Da respectively. Mascot results were combined in Scaffold v. 4 (Proteome Software) and exported in Excel (Microsoft Office).

Grubb LE et al. Supplemental Data.

## Supplemental References

**Bailey TL, Boden M, Buske FA, Frith M, Grant CE, Clementi L, Ren J, Li WW, Noble WS** (2009) MEME SUITE: tools for motif discovery and searching. *Nucleic Acids Res* **37**: W202–8

**Bender KW, Blackburn RK, Monaghan J, Derbyshire P, Menke FLH, Zipfel C, Goshe MB, Zielinski RE, Huber SC** (2017) Autophosphorylation-based Calcium (Ca<sup>2+</sup>) Sensitivity Priming and Ca<sup>2+</sup>/Calmodulin Inhibition of Arabidopsis thaliana Ca<sup>2+</sup>-dependent Protein Kinase 28 (CPK28). *J Biol Chem* **292**: 3988–4002

**Crooks GE, Hon G, Chandonia J-M, Brenner SE** (2004) WebLogo: a sequence logo generator. *Genome Res* **14**: 1188–1190

**Igawa T, Fujiwara M, Takahashi H, Sawasaki T, Endo Y, Seki M, Shinozaki K, Fukao Y, Yanagawa Y** (2009) Isolation and identification of ubiquitin-related proteins from Arabidopsis seedlings. *J Exp Bot* **60**: 3067–3073

**Johnson A, Vert G** (2016) Unraveling K63 Polyubiquitination Networks by Sensor-Based Proteomics. *Plant Physiol* **171**: 1808–1820

**Kim D-Y, Scalf M, Smith LM, Vierstra RD** (2013) Advanced proteomic analyses yield a deep catalog of ubiquitylation targets in Arabidopsis. *Plant Cell* **25**: 1523–1540

**Manzano C, Abraham Z, López-Torrejón G, Del Pozo JC** (2008) Identification of ubiquitinated proteins in Arabidopsis. *Plant Mol Biol* **68**: 145–158

**Maor R, Jones A, Nühse TS, Studholme DJ, Peck SC, Shirasu K** (2007) Multidimensional protein identification technology (MudPIT) analysis of ubiquitinated proteins in plants. *Mol Cell Proteomics* **6**: 601–610

**Raudvere U, Kolberg L, Kuzmin I, Arak T, Adler P, Peterson H, Vilo J** (2019) g:Profiler: a web server for functional enrichment analysis and conversions of gene lists (2019 update). *Nucleic Acids Res* **47**: W191–W198

**Romero-Barrios N, Monachello D, Dolde U, Wong A, San Clemente H, Cayrel A, Johnson A, Lurin C, Vert G** (2020) Advanced Cataloging of Lysine-63 Polyubiquitin Networks by Genomic, Interactome, and Sensor-Based Proteomic Analyses. *Plant Cell* **32**: 123–138

**Svozil J, Hirsch-Hoffmann M, Dudler R, Gruissem W, Baerenfaller K** (2014) Protein abundance changes and ubiquitylation targets identified after inhibition of the proteasome with syringolin A. *Mol Cell Proteomics* **13**: 1523–1536

**Walton A, Stes E, Cybulski N, Van Bel M, Inigo S** (2016) It's time for some "site"-seeing: novel tools to monitor the ubiquitin landscape in Arabidopsis thaliana. *The Plant*

## Supplemental Tables

### **Table S1: High-confidence peptides identified in multiple experiments.**

Peptides shown were filtered for the ubiquitin remnant diGly and were observed at least twice with a minimal Mascot score of 20. The peptide level false discovery rate was 0.025. Columns J to AR report the number of spectra observed in total (J), subtotals per genotype and treatment (K-Q) or in individual samples (S-AR). Column I shows whether the assignment of the diGly modified residue is possibly ambiguous (P) or not ambiguous (N).

### **Table S2: Peptides identified in single experiments.**

Peptides shown were filtered for the ubiquitin remnant diGly and were observed at once with a minimal Mascot score of 20. The peptide level false discovery rate was 0.025. Columns J to AR report the number of spectra observed in total (J), subtotals per genotype and treatment (K-Q) or in individual samples (S-AR). Column I shows whether the assignment of the diGly modified residue is possibly ambiguous (P) or not ambiguous (N).

### **Table S3: Gene ontology terms associated with proteins identified in this study.**

Gene ontology profiling was conducted using unique protein identifiers from Table S1 in g:profiler (Raudvere et al., 2019).

Grubb LE et al. Supplemental Data.

**Table S4: Comparative analysis reveals 268 unique ubiquitin targets identified in this study.**

Ubiquitinated proteins identified from earlier large-scale studies (Maor et al., 2007; Manzano et al., 2008; Igawa et al., 2009; Kim et al., 2013; Svozil et al., 2014; Johnson and Vert, 2016; Walton et al., 2016; Romero-Barrios et al., 2020) were compared to those identified in this study (Table S1) using Microsoft Excel. Manual inspection of the literature revealed additional ubiquitinated proteins, as well as proteins predicted to be ubiquitinated.



## Supplemental Figures

### Figure S1: Ubiquitinated residues identified on BIK1.

Ten tryptic peptides mapping to BIK1 contain di-Gly remnants in different genotypes and treatments as outlined in (A); the modified Lys residue is coloured blue. Mass spectra for each peptide were extracted from Scaffold and shown in (B); B- and Y-ions are coloured in red and blue, respectively.

### Figure S2: Consensus motif analysis of ubiquitinated lysines.

Non-redundant full-length protein sequences were retrieved from The Arabidopsis Information Resource (TAIR) and peptide sequences -10 and +10 amino- and carboxyl-terminal to the modified lysines were identified using the MID function in Microsoft Excel. These 21-amino-acid peptide sequences were analyzed using the MEME Suite v5.1.1 MoMo motif finder tool (Bailey et al., 2009), however no statistically significant ( $p < 0.05$ ) consensus motifs were identified. A multiple-sequence alignment of the peptide sequences surrounding the modified lysine was created using WebLogo (Crooks et al., 2004). Blue residues contain positively-charged R-groups (KHR); Black residues are negatively-charged (DE); Magenta residues are hydrophobic (AILMFWYV); Green residues are polar uncharged (STNQ); Yellow residues are special cases (CGP).

| BIK1 peptide sequence                    | K-GG      | pBIK1:BIK1-HA |       |          |       |         |       |
|------------------------------------------|-----------|---------------|-------|----------|-------|---------|-------|
|                                          |           | Co-0          |       | CPK28-OE |       | cpk28-1 |       |
|                                          |           | mock          | elf18 | mock     | elf18 | mock    | elf18 |
| KSSSTVAAAQKTEGILSSTPVK                   | K31       |               | 1     |          |       |         | 1     |
| KSSSTVAAAQKTEGILSSTPVK                   | K41       |               | 2     |          |       |         |       |
| SSSTVAAAQKTEGILSSTPVK                    | K41       | 2             | 2     | 4        |       | 2       | 2     |
| SFTFNELK <sup>GG</sup> LATR              | K61       | 2             | 3     | 2        | 2     | 2       | 3     |
| LLVYEFmQK <sup>GG</sup> GSLENHLFR        | K155      | 1             |       |          |       |         |       |
| MASVAVQcLSFEPK <sup>GG</sup> SRPTmDQVVRR | K337      |               | 1     |          |       |         |       |
| ALQQLQDNLGK <sup>GG</sup> PSQTNPVKDTK    | K358      | 1             | 1     |          |       |         | 2     |
| ALQQLQDNLGK <sup>GG</sup> PSQTNPVKDTK    | K366      | 1             | 2     |          |       | 1       | 1     |
| ALQQLQDNLGK <sup>GG</sup> PSQTNPVKDTK    | K366/K369 |               | 1     |          |       |         |       |
| LGFK <sup>GG</sup> TGTTK                 | K374      |               |       |          |       | 1       |       |
| FTQK <sup>GG</sup> PFGR                  | K388      | 1             | 4     | 1        |       |         | 3     |

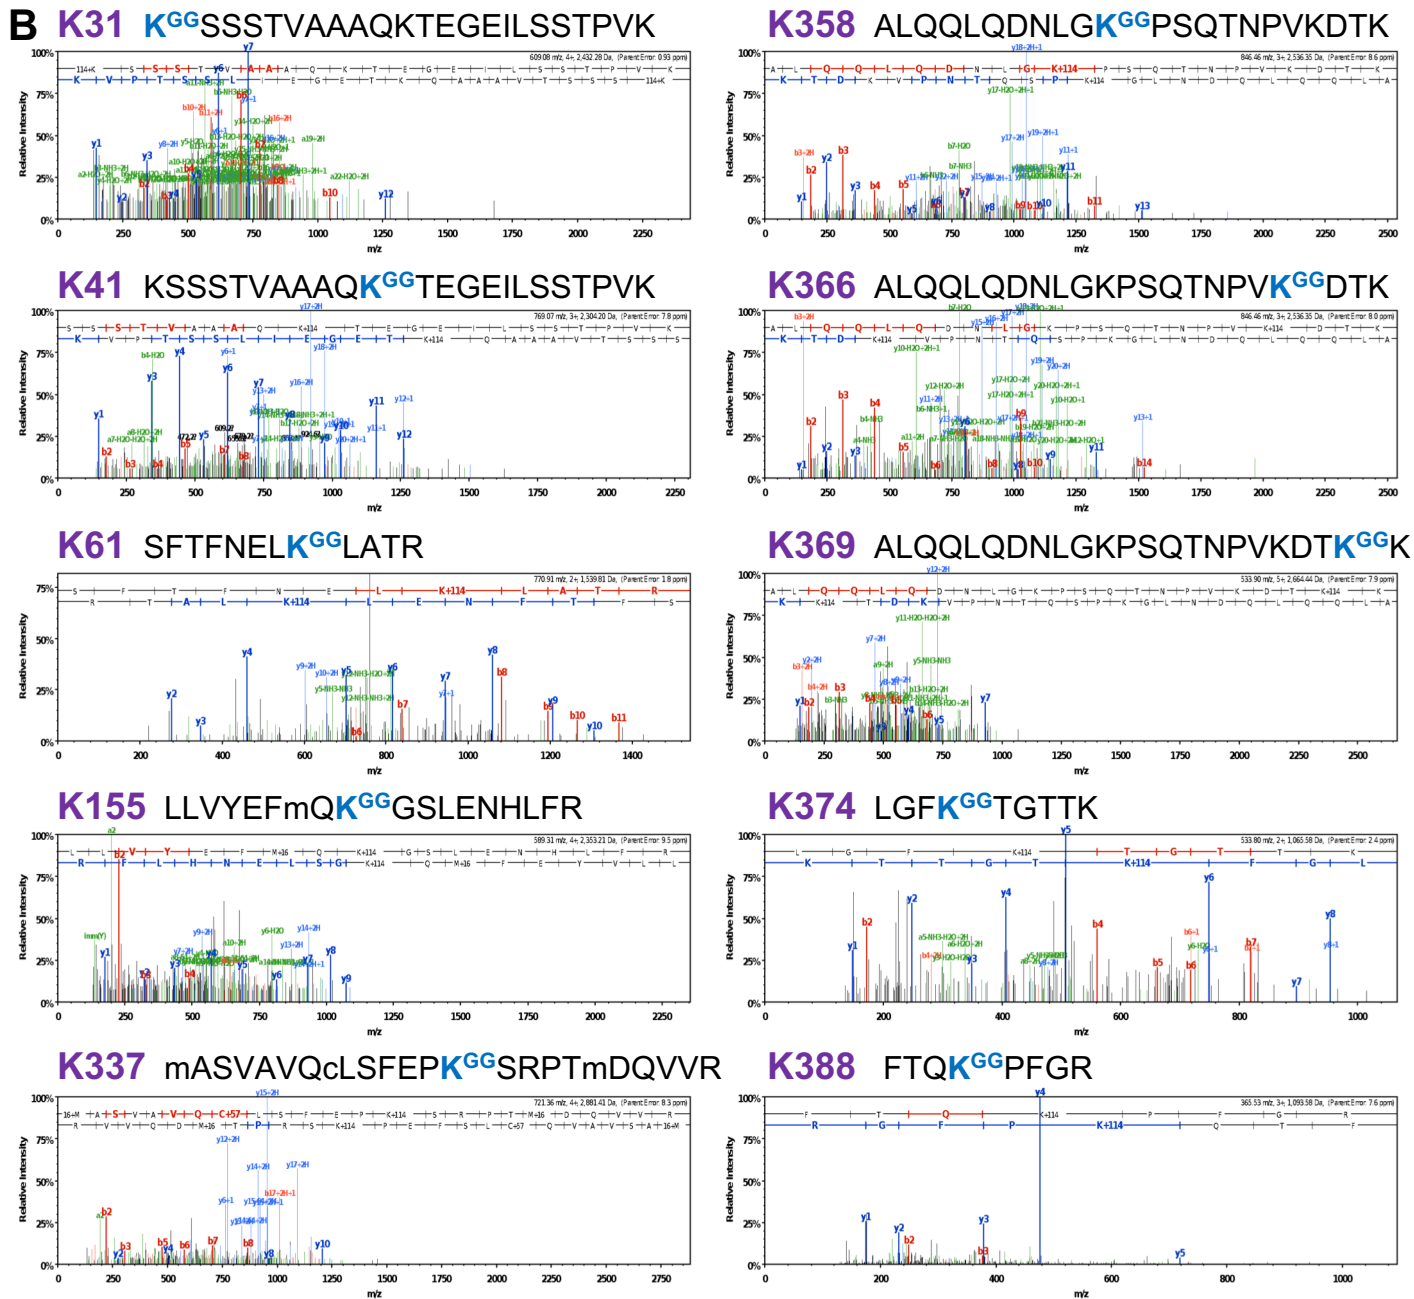

**Figure S1: Ubiquitinated residues identified on BIK1.**

Ten tryptic peptides mapping to BIK1 contain di-Gly remnants in different genotypes and treatments as outlined in (A); the modified Lys residue is coloured blue. Mass spectra for each peptide were extracted from Scaffold and shown in (B); B- and Y-ions are coloured in red and blue, respectively.

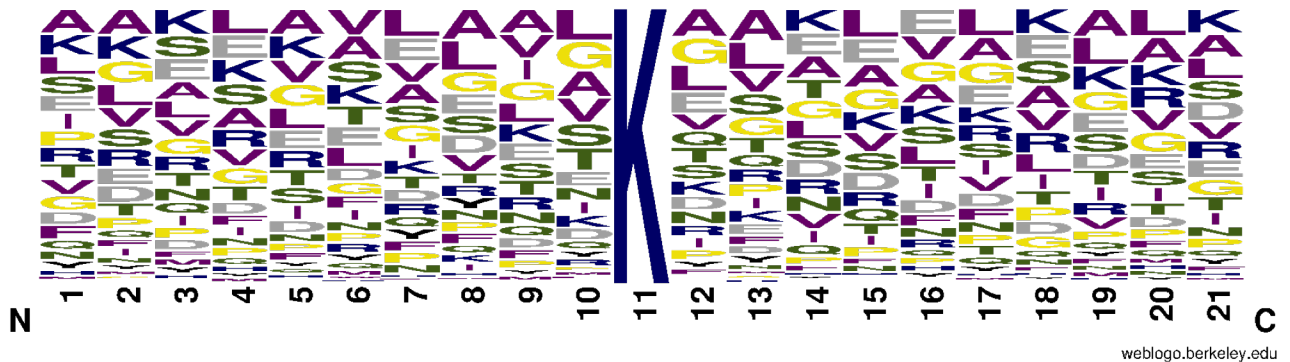

## Figure S2: Consensus motif analysis of ubiquitinated lysines.

Non-redundant full-length protein sequences were retrieved from The Arabidopsis Information Resource (TAIR) and peptide sequences -10 and +10 amino- and carboxyl-terminal to the modified lysines were identified using the MID function in Microsoft Excel. These 21-amino-acid peptide sequences were analyzed using the MEME Suite v5.1.1 MoMo motif finder tool (Bailey et al., 2009), however no statistically significant ( $p < 0.05$ ) consensus motifs were identified. A multiple-sequence alignment of the peptide sequences surrounding the modified lysine was created using WebLogo (Crooks et al., 2004). Blue residues contain positively-charged R-groups (KHR); Black residues are negatively-charged (DE); Magenta residues are hydrophobic (AILMFYWV); Green residues are polar uncharged (STNQ); Yellow residues are special cases (CGP).

**Table S4. Comparative analysis reveals 265 unique ubiquitin targets identified in this study.**

Ubiquitinated proteins identified from earlier large-scale studies (Maor et al., 2007; Manzano et al., 2008; Igawa et al., 2009; Kim et al., 2013; Svozil et al., 2014; Johnson and Vert, 2016; Walton et al., 2016; Romero-Barrios et al., 2020) were compared to those identified in this study (Table S1) using Microsoft Excel. Manual inspection of the literature revealed additional ubiquitinated proteins, as well as proteins predicted to be ubiquitinated.

| Accession | Protein name                                    | References                                                    |
|-----------|-------------------------------------------------|---------------------------------------------------------------|
| AT1G01610 | GPAT4                                           | (Svozil et al., 2015; Romero-Barrios et al., 2020)            |
| AT1G02520 | ABC11/MDR8/PGP11                                | (Kim et al., 2013; Johnson and Vert, 2016)                    |
| AT1G02780 | Emb2386   Ribosomal protein L19e family protein | (Svozil et al., 2014; Walton et al., 2016)                    |
| AT1G03760 | Prefoldin chaperone subunit family protein      | (Walton et al., 2016)                                         |
| AT1G04410 | c-NAD-MDH1                                      | (Saracco et al., 2009; Romero-Barrios et al., 2020)           |
| AT1G04750 | VAMP7B/VAMP721                                  | (Saracco et al., 2009; Yun et al., 2013; Walton et al., 2016) |
| AT1G04820 | TUA4/TOR2                                       | (Zhang et al., 2019; Romero-Barrios et al., 2020)             |
| AT1G06700 | PTI1-1                                          | (Kim et al., 2013)                                            |
| AT1G06890 | UXT3                                            |                                                               |
| AT1G09195 | Metal-dependent phosphohydrolase                |                                                               |
| AT1G09330 | ECHIDNA                                         |                                                               |
| AT1G09920 | TRAF-type zinc finger-related                   |                                                               |
| AT1G09970 | LRR XI-23/RLK7                                  |                                                               |
| AT1G10630 | ARFA1F                                          | (Aguilar-Hernández et al., 2017; Romero-Barrios et al., 2020) |
| AT1G11050 | Protein kinase superfamily protein              |                                                               |
| AT1G11260 | STP1                                            | (Romero-Barrios et al., 2020)                                 |
| AT1G11300 | EGM1                                            |                                                               |
| AT1G11330 | RDA2                                            |                                                               |

Grubb LE et al. Supplemental Table S4.

|           |                                                                           |                                                                                              |
|-----------|---------------------------------------------------------------------------|----------------------------------------------------------------------------------------------|
| AT1G11350 | CBRLK1/RKS2                                                               |                                                                                              |
| AT1G12000 | Phosphofructokinase family protein                                        | (Kim et al., 2013; Walton et al., 2016)                                                      |
| AT1G12110 | NRT1.1/CHL1-1                                                             | (Johnson and Vert, 2016; Liu et al., 2017)                                                   |
| AT1G12330 | Cyclin-dependent kinase-like protein                                      |                                                                                              |
| AT1G12760 | Zinc finger, C3HC4 type (RING finger) family protein                      | (Stone et al., 2005)                                                                         |
| AT1G13210 | ACA.I                                                                     |                                                                                              |
| AT1G14200 | RING/U-box superfamily protein                                            |                                                                                              |
| AT1G14910 | ENTH/ANTH/VHS superfamily protein                                         |                                                                                              |
| AT1G15210 | PDR7/ABCG35                                                               | (Kim et al., 2013)                                                                           |
| AT1G15690 | AVP1                                                                      | (Kim et al., 2013; Johnson and Vert, 2016; Pizzio et al., 2017; Romero-Barrios et al., 2020) |
| AT1G16410 | CYP79F1/BUS1/SPS1                                                         |                                                                                              |
| AT1G16690 | Enhancer of polycomb-like transcription factor protein                    |                                                                                              |
| AT1G16860 | Ubiquitin-specific protease family C19-related protein                    |                                                                                              |
| AT1G17145 | RING/U-box superfamily protein                                            |                                                                                              |
| AT1G17200 | Uncharacterised protein family (UPF0497)                                  |                                                                                              |
| AT1G17500 | ATPase E1-E2 type family protein                                          | (Kim et al., 2013)                                                                           |
| AT1G17620 | Late embryogenesis abundant (LEA) hydroxyproline-rich glycoprotein family |                                                                                              |
| AT1G18470 | Transmembrane Fragile-X-F-associated protein                              |                                                                                              |
| AT1G19670 | CLH1/CORI1                                                                |                                                                                              |
| AT1G20260 | ATPase, V1 complex, subunit B protein                                     | (Johnson and Vert, 2016; Romero-Barrios et al., 2020)                                        |
| AT1G20330 | SMT2/CVP1/FRL1                                                            |                                                                                              |
| AT1G20696 | HMGB3/NFD3/NFD03                                                          | (Saracco et al., 2009; Walton et al., 2016)                                                  |

Grubb LE et al. Supplemental Table S4.

|           |                                            |                                                                                                    |
|-----------|--------------------------------------------|----------------------------------------------------------------------------------------------------|
| AT1G21250 | WAK1/PRO25                                 | (Till et al., 2019)                                                                                |
| AT1G21270 | WAK2                                       |                                                                                                    |
| AT1G22280 | PAPP2C                                     |                                                                                                    |
| AT1G22500 | ATL15                                      | (Stone et al., 2005)                                                                               |
| AT1G22710 | SUC2/SUT1                                  | (Romero-Barrios et al., 2020; Xu et al., 2020)                                                     |
| AT1G23080 | PIN7                                       | (Abas et al., 2006; Titapiwatanakun, 2008; Thomann et al., 2009; Titapiwatanakun and Murphy, 2009) |
| AT1G25390 | LRK10L4                                    |                                                                                                    |
| AT1G26120 | ICME-LIKE1                                 |                                                                                                    |
| AT1G27000 | Protein of unknown function (DUF1664)      | (Romero-Barrios et al., 2020)                                                                      |
| AT1G27190 | BIR3                                       |                                                                                                    |
| AT1G28440 | HSL1                                       |                                                                                                    |
| AT1G30320 | Remorin family protein                     |                                                                                                    |
| AT1G30360 | ERD4                                       | (Johnson and Vert, 2016; Romero-Barrios et al., 2020)                                              |
| AT1G30400 | MRP1/EST1/ABCC1                            | (Johnson and Vert, 2016; Romero-Barrios et al., 2020)                                              |
| AT1G30440 | Phototropic-responsive NPH3 family protein | (Kim et al., 2013)                                                                                 |
| AT1G30570 | HERK2                                      |                                                                                                    |
| AT1G31420 | FEI1                                       |                                                                                                    |
| AT1G32050 | SCAMP family protein                       |                                                                                                    |
| AT1G32090 | ERD4                                       |                                                                                                    |
| AT1G32400 | TOM2A                                      | (Walton et al., 2016)                                                                              |
| AT1G34300 | Lectin protein kinase family protein       |                                                                                                    |
| AT1G43790 | TED6                                       |                                                                                                    |
| AT1G45201 | TLL1                                       | (Kim et al., 2013)                                                                                 |

Grubb LE et al. Supplemental Table S4.

|           |                                                                                              |                                                                               |
|-----------|----------------------------------------------------------------------------------------------|-------------------------------------------------------------------------------|
| AT1G45688 | unknown protein                                                                              |                                                                               |
| AT1G47290 | AT3BETAHSD/D1                                                                                |                                                                               |
| AT1G47530 | MATE efflux family protein                                                                   |                                                                               |
| AT1G48480 | RKL1                                                                                         | (Romero-Barrios et al., 2020)                                                 |
| AT1G51500 | CER5/D3/ABCG12/WBC12                                                                         |                                                                               |
| AT1G51570 | Calcium-dependent lipid-binding (CaLB domain) plant phosphoribosyltransferase family protein |                                                                               |
| AT1G51800 | IOS1                                                                                         |                                                                               |
| AT1G52310 | C-type lectin receptor kinase                                                                |                                                                               |
| AT1G52320 | unknown protein                                                                              |                                                                               |
| AT1G52740 | HTA9                                                                                         | (Sura et al., 2017; Gómez-Zambrano et al., 2019; Romero-Barrios et al., 2020) |
| AT1G53210 | Sodium/calcium exchanger family protein / calcium-binding EF hand family protein             |                                                                               |
| AT1G53310 | PPC1/PEPC1                                                                                   | (Uhrig et al., 2008; Kim et al., 2013)                                        |
| AT1G53750 | RPT1A                                                                                        | (Kim et al., 2013; Walton et al., 2016)                                       |
| AT1G55060 | UBQ12                                                                                        |                                                                               |
| AT1G55350 | DEK1                                                                                         |                                                                               |
| AT1G55450 | S-adenosyl-L-methionine-dependent methyltransferases superfamily protein                     |                                                                               |
| AT1G56070 | LOS1                                                                                         | (Walton et al., 2016; Romero-Barrios et al., 2020)                            |
| AT1G56145 | LRR transmembrane protein kinase                                                             |                                                                               |
| AT1G56630 | Alpha/beta-Hydrolases superfamily protein                                                    |                                                                               |
| AT1G58030 | CAT2                                                                                         |                                                                               |
| AT1G58380 | XW6                                                                                          | (Kim et al., 2013)                                                            |

Grubb LE et al. Supplemental Table S4.

|           |                                                          |                                                                                                     |
|-----------|----------------------------------------------------------|-----------------------------------------------------------------------------------------------------|
| AT1G59870 | PEN3/PDR8/ABCG36                                         | (Kim et al., 2013; Johnson and Vert, 2016; Romero-Barrios et al., 2020)                             |
| AT1G61380 | LORE/SD1-29                                              |                                                                                                     |
| AT1G61550 | S-locus lectin protein kinase family protein             |                                                                                                     |
| AT1G61550 | Major Facilitator Superfamily with SPX (SYG1/Pho81/XPR1) |                                                                                                     |
| AT1G63500 | BSK7                                                     | (Li et al., 2019)                                                                                   |
| AT1G64340 | Unknown protein                                          |                                                                                                     |
| AT1G64950 | CYP89A5                                                  |                                                                                                     |
| AT1G65350 | UBQ13                                                    | (Johnson and Vert, 2016; Romero-Barrios et al., 2020)                                               |
| AT1G65720 | Unknown protein                                          |                                                                                                     |
| AT1G65930 | clCDH                                                    | (Kim et al., 2013; Svozil et al., 2015)                                                             |
| AT1G65950 | Protein kinase superfamily protein                       |                                                                                                     |
| AT1G66150 | TMK1                                                     |                                                                                                     |
| AT1G68070 | Zinc finger, C3HC4 type (RING finger) family protein     |                                                                                                     |
| AT1G68720 | TADA                                                     | (Walton et al., 2016)                                                                               |
| AT1G68820 | Transmembrane Fragile-X-F-associated protein             |                                                                                                     |
| AT1G70410 | BCA4                                                     | (Kim et al., 2013; Johnson and Vert, 2016; Romero-Barrios et al., 2020)                             |
| AT1G70670 | Caleosin-related family protein                          |                                                                                                     |
| AT1G70770 | Protein of unknown function DUF2359                      | (Kim et al., 2013; Romero-Barrios et al., 2020)                                                     |
| AT1G70940 | PIN3                                                     | (Abas et al., 2006; Titapiwatanakun, 2008; Thomann et al., 2009; Titapiwatanakun and Murphy, 2009). |
| AT1G71140 | MATE efflux family protein                               |                                                                                                     |
| AT1G71880 | SUC1                                                     | (Xu et al., 2020)                                                                                   |



Grubb LE et al. Supplemental Table S4.

|           |                                                                               |                                                 |
|-----------|-------------------------------------------------------------------------------|-------------------------------------------------|
| AT1G72370 | P40/AP40/RP40/RPSAA                                                           | (Kim et al., 2013; Walton et al., 2016)         |
| AT1G72500 | Unknown protein                                                               |                                                 |
| AT1G72910 | Toll-Interleukin-Resistance (TIR) domain-containing protein                   |                                                 |
| AT1G73220 | AtOCT1                                                                        |                                                 |
| AT1G74050 | Ribosomal protein L6 family protein                                           | (Walton et al., 2016)                           |
| AT1G74520 | HVA22A                                                                        |                                                 |
| AT1G74720 | QKY   C2 calcium/lipid-binding plant phosphoribosyltransferase family protein |                                                 |
| AT1G75500 | WAT1                                                                          |                                                 |
| AT1G75840 | ARAC5/ATGP3/ROP4                                                              |                                                 |
| AT1G76390 | PUB43                                                                         |                                                 |
| AT1G76600 | Unknown protein                                                               |                                                 |
| AT1G77210 | STP14                                                                         |                                                 |
| AT1G77660 | Histone H3 K4-specific methyltransferase SET7/9 family protein                |                                                 |
| AT1G78870 | UBC35                                                                         |                                                 |
| AT1G78900 | VHA-A                                                                         | (Kim et al., 2013; Romero-Barrios et al., 2020) |
| AT1G79410 | AtOCT5                                                                        |                                                 |
| AT1G80870 | LRR-VIIa family protein kinase                                                |                                                 |
| AT2G01470 | STL2P/ATSEC12                                                                 |                                                 |
| AT2G01735 | RIE1                                                                          |                                                 |
| AT2G01820 | TMK3                                                                          |                                                 |
| AT2G02040 | PTR2-B/NTR1                                                                   |                                                 |
| AT2G04350 | LACS8                                                                         | (Walton et al., 2016)                           |

Grubb LE et al. Supplemental Table S4.

|           |                                                                         |                                                                                      |
|-----------|-------------------------------------------------------------------------|--------------------------------------------------------------------------------------|
| AT2G13610 | ABC-2 type transporter family protein                                   |                                                                                      |
| AT2G13800 | SERK5/BAK8                                                              |                                                                                      |
| AT2G17220 | PBL32/KIN3                                                              |                                                                                      |
| AT2G18960 | AHA1                                                                    | (Kim et al., 2013; Johnson and Vert, 2016; Romero-Barrios et al., 2020)              |
| AT2G19110 | HMA4                                                                    |                                                                                      |
| AT2G19130 | S-locus lectin protein kinase family protein                            |                                                                                      |
| AT2G19730 | Ribosomal L28e protein family                                           | (Kim et al., 2013; Svozil et al., 2014; Johnson and Vert, 2016; Walton et al., 2016) |
| AT2G19750 | Ribosomal protein S30 family protein                                    |                                                                                      |
| AT2G20140 | AAA-type ATPase family protein                                          | (Kim et al., 2013)                                                                   |
| AT2G20230 | Tetraspanin family protein                                              |                                                                                      |
| AT2G20740 | Tetraspanin family protein                                              |                                                                                      |
| AT2G20990 | SYTA                                                                    | (Romero-Barrios et al., 2020)                                                        |
| AT2G21410 | VHA-A2                                                                  |                                                                                      |
| AT2G23200 | CrRLK1L-1 family protein                                                |                                                                                      |
| AT2G23950 | CLERK                                                                   |                                                                                      |
| AT2G25070 | Protein phosphatase 2C family protein                                   |                                                                                      |
| AT2G25270 | Unknown protein                                                         |                                                                                      |
| AT2G25450 | 2-oxoglutarate (2OG) and Fe(II)-dependent oxygenase superfamily protein | (Kim et al., 2013; Svozil et al., 2015)                                              |
| AT2G26070 | RTE1   Protein of unknown function (DUF778)                             |                                                                                      |
| AT2G26250 | FDH/KCS10                                                               | (McNeilly et al., 2018; Romero-Barrios et al., 2020)                                 |
| AT2G26300 | GPA1                                                                    |                                                                                      |

Grubb LE et al. Supplemental Table S4.

|           |                                                                              |                               |
|-----------|------------------------------------------------------------------------------|-------------------------------|
| AT2G26330 | ERECTA                                                                       |                               |
| AT2G26730 | LRR-III family protein kinase                                                |                               |
| AT2G26910 | PDR4                                                                         |                               |
| AT2G27350 | OTU-like cysteine protease family protein                                    |                               |
| AT2G27690 | CYP94C1                                                                      |                               |
| AT2G27810 | ATNAT12                                                                      | (Walton et al., 2016)         |
| AT2G28070 | ABC-2 type transporter family protein                                        |                               |
| AT2G28120 | Major facilitator superfamily protein                                        |                               |
| AT2G28520 | VHA-A1                                                                       |                               |
| AT2G30230 | unknown protein                                                              |                               |
| AT2G30490 | C4H/CYP73A5/REF3                                                             | (Kim et al., 2013)            |
| AT2G30520 | RPT2                                                                         | (Johnson and Vert, 2016)      |
| AT2G30620 | Winged-helix DNA-binding transcription factor family protein                 |                               |
| AT2G30740 | PTI1-2                                                                       | (Kim et al., 2013)            |
| AT2G30750 | CYP71A12                                                                     |                               |
| AT2G30870 | GSTF10/ERD13/GSTF4                                                           | (Romero-Barrios et al., 2020) |
| AT2G30930 | Unknown protein                                                              | (Svozil et al., 2014)         |
| AT2G32730 | 26S proteasome regulatory complex, non-ATPase subcomplex, Rpn2/Psmd1 subunit | (Kim et al., 2013)            |
| AT2G35635 | UBQ7                                                                         | (Walton et al., 2016)         |
| AT2G35720 | OWL1                                                                         |                               |
| AT2G36100 | Uncharacterised protein family (UPF0497)                                     | (Svozil et al., 2015)         |
| AT2G36380 | PDR6                                                                         | (Johnson and Vert, 2016)      |
| AT2G36570 | PXC1                                                                         |                               |

Grubb LE et al. Supplemental Table S4.

|           |                                       |                                                                                           |
|-----------|---------------------------------------|-------------------------------------------------------------------------------------------|
| AT2G36850 | GSL08                                 |                                                                                           |
| AT2G36910 | PGP1/ABCB1                            | (Walton et al., 2016)                                                                     |
| AT2G37040 | PAL1                                  | (Kim et al., 2013; Svozil et al., 2014)                                                   |
| AT2G37050 | BSR050                                | (Romero-Barrios et al., 2020)                                                             |
| AT2G37110 | PLAC8 family protein                  |                                                                                           |
| AT2G37170 | PIP2B/PIP2;2                          | (Lee et al., 2009; Romero-Barrios et al., 2020)                                           |
| AT2G37470 | Histone superfamily protein           |                                                                                           |
| AT2G37710 | RLK/LECRK-IV.1                        |                                                                                           |
| AT2G38360 | PRA1.B4                               | (Svozil et al., 2014)                                                                     |
| AT2G38810 | HTA8                                  | (Sura et al., 2017; Gómez-Zambrano et al., 2019)                                          |
| AT2G38940 | ATPT2/PHT1;4                          | (Huang et al., 2013; Lin et al., 2013; Park et al., 2014)                                 |
| AT2G39210 | Major facilitator superfamily protein |                                                                                           |
| AT2G39660 | BIK1                                  | (Monaghan et al., 2014; Wang et al., 2018; Ma et al., 2020)                               |
| AT2G41560 | ACA4                                  |                                                                                           |
| AT2G41840 | Ribosomal protein S5 family protein   | (Kim et al., 2013; Svozil et al., 2014; Johnson and Vert, 2016)                           |
| AT2G42600 | ATPPC2                                | (Saracco et al., 2009; Kim et al., 2013; Svozil et al., 2014)                             |
| AT2G45820 | Remorin family protein                | (Svozil et al., 2014; Johnson and Vert, 2016)                                             |
| AT2G45960 | PIP1B/PIP1;2                          | (Lee et al., 2009; Kim et al., 2013; Johnson and Vert, 2016; Romero-Barrios et al., 2020) |
| AT2G46800 | ZAT/ATMTP1/ATCDF1                     |                                                                                           |
| AT2G47000 | MDR4/PGP4/ABCB4                       | (Kim et al., 2013; Johnson and Vert, 2016; Romero-Barrios et al., 2020)                   |
| AT2G47060 | PTI1-4                                | (Kim et al., 2013)                                                                        |

Grubb LE et al. Supplemental Table S4.

|           |                                                                      |                                                              |
|-----------|----------------------------------------------------------------------|--------------------------------------------------------------|
| AT2G47110 | UBQ6                                                                 |                                                              |
| AT2G47240 | CER8/LACS1                                                           |                                                              |
| AT2G47630 | Alpha/beta-Hydrolases superfamily protein                            |                                                              |
| AT3G01290 | SPFH/Band 7/PHB domain-containing membrane-associated protein family | (Johnson and Vert, 2016; Romero-Barrios et al., 2020)        |
| AT3G01390 | VMA10                                                                | (Walton et al., 2016)                                        |
| AT3G01420 | ALPHA-DOX1                                                           | (Johnson and Vert, 2016)                                     |
| AT3G01570 | Oleosin family protein                                               | (Deruyffelaere et al., 2015; Kretzschmar et al., 2018)       |
| AT3G01670 | Unknown protein                                                      |                                                              |
| AT3G02130 | RPK2/TOAD2/CLI1                                                      |                                                              |
| AT3G03050 | CSLD3/KJK/ATCSLD3                                                    | (Gu et al., 2016)                                            |
| AT3G03310 | ATLCAT3                                                              |                                                              |
| AT3G04120 | GAPC/GAPC-1                                                          | (Peralta et al., 2016)                                       |
| AT3G04840 | Ribosomal protein S3Ae                                               | (Kim et al., 2013; Svozil et al., 2014; Walton et al., 2016) |
| AT3G05160 | Major facilitator superfamily protein                                |                                                              |
| AT3G05165 | Major facilitator superfamily protein                                |                                                              |
| AT3G05200 | ATL6                                                                 |                                                              |
| AT3G05800 | AIF1                                                                 |                                                              |
| AT3G06330 | RING/U-box superfamily protein                                       |                                                              |
| AT3G06450 | HCO <sub>3</sub> <sup>-</sup> transporter family                     |                                                              |
| AT3G08510 | ATPLC2                                                               | (Pokotylo et al., 2014; Romero-Barrios et al., 2020)         |
| AT3G08680 | LRR-III family protein kinase                                        |                                                              |
| AT3G08710 | ATH9/TRX                                                             |                                                              |
| AT3G08930 | LMBR1-like membrane protein                                          |                                                              |

Grubb LE et al. Supplemental Table S4.

|           |                                                              |                                                    |
|-----------|--------------------------------------------------------------|----------------------------------------------------|
| AT3G09440 | Heat shock protein 70 (Hsp 70) family protein                | (Walton et al., 2016; Romero-Barrios et al., 2020) |
| AT3G09740 | SYP71                                                        | (Walton et al., 2016; Romero-Barrios et al., 2020) |
| AT3G09840 | CDC48;/CDC48A                                                | (Kim et al., 2013; Walton et al., 2016)            |
| AT3G11820 | SYP121/PEN1                                                  |                                                    |
| AT3G11930 | Adenine nucleotide alpha hydrolases-like superfamily protein | (Romero-Barrios et al., 2020)                      |
| AT3G12120 | FAD2                                                         | (Dar et al., 2017)                                 |
| AT3G14350 | SRF7                                                         |                                                    |
| AT3G14690 | CYP72A15                                                     |                                                    |
| AT3G14840 | LIK1                                                         | (Kim et al., 2013)                                 |
| AT3G14940 | ATPPC3                                                       | (Kim et al., 2013)                                 |
| AT3G15580 | ATG8I/APG8H                                                  |                                                    |
| AT3G16180 | Major facilitator superfamily protein                        |                                                    |
| AT3G17410 | PTI1-7/CARK1                                                 | (Kim et al., 2013)                                 |
| AT3G17650 | YSL5/PDE321                                                  |                                                    |
| AT3G17840 | RLK902                                                       |                                                    |
| AT3G17970 | TOC64-III                                                    | (Ling et al., 2012)                                |
| AT3G18820 | ATRABG3F/ATRAB7B/RAB71                                       |                                                    |
| AT3G19450 | CAD4/CAD-C                                                   | (Kim et al., 2013; Svozil et al., 2014)            |
| AT3G19930 | STP4                                                         |                                                    |
| AT3G20410 | CPK9                                                         |                                                    |
| AT3G20660 | AtOCT4                                                       |                                                    |
| AT3G21530 | DNase I-like superfamily protein                             |                                                    |
| AT3G21630 | CERK1                                                        | (Yamaguchi et al., 2017)                           |
| AT3G23560 | ALF5                                                         |                                                    |

Grubb LE et al. Supplemental Table S4.

|           |                                                     |                                                              |
|-----------|-----------------------------------------------------|--------------------------------------------------------------|
| AT3G23820 | GAE6                                                |                                                              |
| AT3G24550 | PERK1                                               | (Kim et al., 2013)                                           |
| AT3G25610 | ATPase E1-E2 type family protein                    |                                                              |
| AT3G26830 | PAD3/CYP71B15                                       |                                                              |
| AT3G27390 | unknown protein                                     |                                                              |
| AT3G28040 | LRR-VIIa family protein kinase                      |                                                              |
| AT3G28450 | BIR2                                                |                                                              |
| AT3G28860 | ATMDR1/ATMDR11/PGP19/ABCB19                         | (Romero-Barrios et al., 2020)                                |
| AT3G42050 | vacuolar ATP synthase subunit H family protein      | (Kim et al., 2013; Johnson and Vert, 2016)                   |
| AT3G45600 | TET3                                                |                                                              |
| AT3G45780 | PHOT1/NPH1/RPT1                                     | (Deng et al., 2014)                                          |
| AT3G46060 | ARA3/RAB8A                                          |                                                              |
| AT3G46290 | HERK1                                               |                                                              |
| AT3G46620 | Zinc finger (C3HC4-type RING finger) family protein |                                                              |
| AT3G47250 | Plant protein of unknown function (DUF247)          |                                                              |
| AT3G48740 | SWEET11                                             | (Johnson and Vert, 2016; Romero-Barrios et al., 2020)        |
| AT3G48890 | ATMP2/ATMAPR3                                       | (Kao et al., 2012; Svozil et al., 2014)                      |
| AT3G48990 | AMP-dependent synthetase and ligase family protein  | (Kim et al., 2013; Svozil et al., 2014; Walton et al., 2016) |
| AT3G49010 | ATBBC1/RSU2                                         | (Svozil et al., 2014; Walton et al., 2016)                   |
| AT3G49670 | BAM2                                                |                                                              |
| AT3G50480 | HR4                                                 |                                                              |
| AT3G50930 | BCS1                                                |                                                              |
| AT3G51260 | PAD1                                                | (Svozil et al., 2014; Walton et al., 2016)                   |
| AT3G51460 | RHD4                                                | (Kim et al., 2013)                                           |

Grubb LE et al. Supplemental Table S4.

|           |                                     |                                                                                           |
|-----------|-------------------------------------|-------------------------------------------------------------------------------------------|
| AT3G51550 | FERONIA                             | (Kim et al., 2013; Guo et al., 2018)                                                      |
| AT3G52400 | SYP122                              | (Johnson and Vert, 2016; Walton et al., 2016)                                             |
| AT3G52920 | Family of unknown function (DUF662) | (Walton et al., 2016)                                                                     |
| AT3G52930 | Aldolase superfamily protein        | (Romero-Barrios et al., 2020)                                                             |
| AT3G53020 | STV1/RPL24B/RPL24                   | (Kim et al., 2013; Walton et al., 2016)                                                   |
| AT3G53260 | PAL2                                | (Saracco et al., 2009; Kim et al., 2013; Svozil et al., 2014)                             |
| AT3G53380 | LecRK-VIII.1                        |                                                                                           |
| AT3G53420 | PIP2A/PIP2;1                        | (Lee et al., 2009; Kim et al., 2013; Johnson and Vert, 2016; Romero-Barrios et al., 2020) |
| AT3G53480 | PIS1/PDR9/ABCG37                    | (Johnson and Vert, 2016)                                                                  |
| AT3G53780 | ATRBL4                              |                                                                                           |
| AT3G53870 | Ribosomal protein S3 family protein | (Saracco et al., 2009; Svozil et al., 2014; Romero-Barrios et al., 2020)                  |
| AT3G54030 | BSK6                                | (Li et al., 2019)                                                                         |
| AT3G54140 | PTR1                                |                                                                                           |
| AT3G54300 | VAMP727                             |                                                                                           |
| AT3G54560 | HTA11                               | (Sura et al., 2017; Gómez-Zambrano et al., 2019)                                          |
| AT3G55130 | WBC19                               |                                                                                           |
| AT3G55360 | CER10/ECR/TSC13                     | (Romero-Barrios et al., 2020)                                                             |
| AT3G55950 | CCR3                                |                                                                                           |
| AT3G56170 | CAN                                 |                                                                                           |
| AT3G57330 | ACA11                               |                                                                                           |
| AT3G57570 | ARM repeat superfamily protein      |                                                                                           |



Grubb LE et al. Supplemental Table S4.

|           |                                                                           |                                                                                    |
|-----------|---------------------------------------------------------------------------|------------------------------------------------------------------------------------|
| AT3G59110 | RLCK-V family protein                                                     |                                                                                    |
| AT3G59350 | Protein kinase superfamily protein                                        |                                                                                    |
| AT3G60600 | VAP27-1                                                                   |                                                                                    |
| AT3G61180 | RING/U-box superfamily protein                                            |                                                                                    |
| AT3G61260 | Remorin family protein                                                    | (Svozil et al., 2014; Walton et al., 2016)                                         |
| AT3G62250 | UBQ5                                                                      |                                                                                    |
| AT3G62870 | Ribosomal protein L7Ae/L30e/S12e/Gadd45 family protein                    | (Saracco et al., 2009; Kim et al., 2013; Svozil et al., 2014; Walton et al., 2016) |
| AT3G63260 | MRK1/RAF48                                                                | (Benschop et al., 2007; Romero-Barrios et al., 2020)                               |
| AT4G00090 | Transducin/WD40 repeat-like superfamily protein                           | (Kim et al., 2013)                                                                 |
| AT4G00300 | Fringe-related protein                                                    |                                                                                    |
| AT4G00360 | CYP86A2/ATT1                                                              |                                                                                    |
| AT4G00710 | BSK3                                                                      | (Li et al., 2019)                                                                  |
| AT4G01320 | STE24                                                                     |                                                                                    |
| AT4G01410 | Late embryogenesis abundant (LEA) hydroxyproline-rich glycoprotein family |                                                                                    |
| AT4G02050 | STP7                                                                      |                                                                                    |
| AT4G02100 | Heat shock protein DnaJ with tetratricopeptide repeat                     |                                                                                    |
| AT4G02230 | Ribosomal protein L19e family protein                                     | (Kim et al., 2013; Walton et al., 2016)                                            |
| AT4G02700 | SULTR3;2                                                                  |                                                                                    |
| AT4G04340 | ERD (early-responsive to dehydration stress) family protein               |                                                                                    |
| AT4G04570 | CRK40                                                                     |                                                                                    |
| AT4G04720 | CPK21                                                                     |                                                                                    |
| AT4G05120 | ENT3/FUR1/ATENT3                                                          |                                                                                    |

Grubb LE et al. Supplemental Table S4.

|           |                                                                      |                                                                                    |
|-----------|----------------------------------------------------------------------|------------------------------------------------------------------------------------|
| AT4G05200 | CRK25                                                                | (Johnson and Vert, 2016)                                                           |
| AT4G08850 | MIK2/BSR850                                                          |                                                                                    |
| AT4G09320 | NDPK1                                                                | (Walton et al., 2016)                                                              |
| AT4G11530 | CRK34                                                                |                                                                                    |
| AT4G11680 | Zinc finger, C3HC4 type (RING finger) family protein                 |                                                                                    |
| AT4G13770 | CYP83A1/REF2                                                         |                                                                                    |
| AT4G13930 | SHM4                                                                 | (Zhou et al., 2012)                                                                |
| AT4G13940 | HOG1/EMB1395/SAHH1/MEE58                                             | (Walton et al., 2016; Aguilar-Hernández et al., 2017; Romero-Barrios et al., 2020) |
| AT4G14500 | Polyketide cyclase/dehydrase and lipid transport superfamily protein |                                                                                    |
| AT4G14760 | NET1B                                                                |                                                                                    |
| AT4G15610 | Uncharacterised protein family (UPF0497)                             |                                                                                    |
| AT4G16370 | OPT3                                                                 |                                                                                    |
| AT4G16380 | Heavy metal transport/detoxification superfamily protein             |                                                                                    |
| AT4G16720 | Ribosomal protein L23/L15e family protein                            |                                                                                    |
| AT4G17170 | AT-RAB2/ATRABB1C                                                     | (Kim et al., 2013)                                                                 |
| AT4G21380 | ARK3/RK3/SD1-8                                                       |                                                                                    |
| AT4G21534 | SPHK2                                                                |                                                                                    |
| AT4G22130 | SRF8                                                                 |                                                                                    |
| AT4G22690 | CYP706A1                                                             | (Kim et al., 2013)                                                                 |
| AT4G23180 | CRK10/RLK4                                                           |                                                                                    |
| AT4G23190 | CRK11/RLK3                                                           |                                                                                    |
| AT4G23300 | CRK22                                                                |                                                                                    |

Grubb LE et al. Supplemental Table S4.

|           |                                                         |                                                                                              |
|-----------|---------------------------------------------------------|----------------------------------------------------------------------------------------------|
| AT4G23640 | TRH1/ATKT3/KUP4                                         |                                                                                              |
| AT4G23700 | CHX17                                                   | (Johnson and Vert, 2016)                                                                     |
| AT4G24990 | ATGP4/MUB3                                              |                                                                                              |
| AT4G25140 | OLEO1/OLE1                                              | (Deruyffelaere et al., 2015)                                                                 |
| AT4G26550 | Got1/Sft2-like vesicle transport protein family         |                                                                                              |
| AT4G27300 | SD1-1                                                   |                                                                                              |
| AT4G27500 | PPI1                                                    | (Svozil et al., 2014; Walton et al., 2016)                                                   |
| AT4G28270 | RMA2                                                    |                                                                                              |
| AT4G28350 | LecRK-VII.2                                             |                                                                                              |
| AT4G29410 | Ribosomal L28e protein family                           | (Svozil et al., 2014)                                                                        |
| AT4G30190 | AHA2                                                    | (Kim et al., 2013; Johnson and Vert, 2016; Walton et al., 2016; Romero-Barrios et al., 2020) |
| AT4G30210 | AR2                                                     |                                                                                              |
| AT4G31130 | Protein of unknown function (DUF1218)                   |                                                                                              |
| AT4G31480 | Coatomer, beta subunit                                  | (Kim et al., 2013; Svozil et al., 2014; Johnson and Vert, 2016; Romero-Barrios et al., 2020) |
| AT4G31500 | CYP83B1/SUR2/RNT1/RED1/ATR4                             |                                                                                              |
| AT4G31570 | Unknown protein                                         | (Kim et al., 2013; Svozil et al., 2014)                                                      |
| AT4G31590 | ATCSLC05/ATCSLC5                                        |                                                                                              |
| AT4G32150 | VAMP711                                                 |                                                                                              |
| AT4G32300 | SD2-5                                                   | (Kim et al., 2013)                                                                           |
| AT4G32410 | CESA1/RSW1                                              | (Taylor, 2007; Watanabe et al., 2018; Romero-Barrios et al., 2020)                           |
| AT4G33360 | FLDH   NAD(P)-binding Rossmann-fold superfamily protein | (Kim et al., 2013; Svozil et al., 2014)                                                      |

Grubb LE et al. Supplemental Table S4.

|           |                                                  |                                                                                                                   |
|-----------|--------------------------------------------------|-------------------------------------------------------------------------------------------------------------------|
| AT4G35230 | BSK1                                             | (Kim et al., 2013; Li et al., 2019)                                                                               |
| AT4G35790 | PLD-DELTA                                        |                                                                                                                   |
| AT4G36670 | Major facilitator superfamily protein            |                                                                                                                   |
| AT4G37640 | ACA2                                             |                                                                                                                   |
| AT4G38520 | Protein phosphatase 2C family protein            |                                                                                                                   |
| AT4G38630 | RPN10/MCB1/MBP1                                  | (Walton et al., 2016)                                                                                             |
| AT4G39080 | VHA-A3                                           | (Kim et al., 2013; Johnson and Vert, 2016; Romero-Barrios et al., 2020)                                           |
| AT4G39950 | CYP79B2                                          |                                                                                                                   |
| AT4G40030 | Histone superfamily protein                      |                                                                                                                   |
| AT5G01410 | PDX1/PDX1.3/RSR4                                 | (Kim et al., 2013; Svozil et al., 2014; Johnson and Vert, 2016; Walton et al., 2016; Romero-Barrios et al., 2020) |
| AT5G01460 | LMBR1-like membrane protein                      |                                                                                                                   |
| AT5G02500 | HSC70-1/HSP70-1                                  | (Johnson and Vert, 2016; Walton et al., 2016; Romero-Barrios et al., 2020)                                        |
| AT5G02540 | NAD(P)-binding Rossmann-fold superfamily protein |                                                                                                                   |
| AT5G02870 | Ribosomal protein L4/L1 family                   | (Walton et al., 2016)                                                                                             |
| AT5G03760 | ATCSLA09,/ATCSLA9/RAT4                           |                                                                                                                   |
| AT5G04320 | Shugoshin C terminus                             |                                                                                                                   |
| AT5G04530 | KCS19                                            |                                                                                                                   |
| AT5G05170 | CESA3/IXR1/ATH-B/CEV1                            | (Taylor, 2007; Johnson and Vert, 2016; Watanabe et al., 2018; Romero-Barrios et al., 2020)                        |
| AT5G06530 | ABC-2 type transporter family protein            |                                                                                                                   |
| AT5G07910 | Leucine-rich repeat (LRR) family protein         |                                                                                                                   |
| AT5G08080 | SYP132                                           |                                                                                                                   |

Grubb LE et al. Supplemental Table S4.

|           |                                                        |                                                       |
|-----------|--------------------------------------------------------|-------------------------------------------------------|
| AT5G10290 | LRR-II family protein kinase                           |                                                       |
| AT5G10360 | EMB3010/RPS6B                                          | (Walton et al., 2016)                                 |
| AT5G10420 | MATE efflux family protein                             |                                                       |
| AT5G13160 | PBS1                                                   |                                                       |
| AT5G13550 | SULTR4;1                                               |                                                       |
| AT5G15490 | UDP-glucose 6-dehydrogenase family protein             | (Kim et al., 2013)                                    |
| AT5G16130 | Ribosomal protein S7e family protein                   | (Svozil et al., 2014; Walton et al., 2016)            |
| AT5G16130 | Ribosomal protein S7e family protein                   | (Svozil et al., 2014; Walton et al., 2016)            |
| AT5G16590 | LRR1                                                   | (Johnson and Vert, 2016; Romero-Barrios et al., 2020) |
| AT5G16870 | Peptidyl-tRNA hydrolase II (PTH2) family protein       |                                                       |
| AT5G16880 | Target of Myb protein 1                                | (Svozil et al., 2014)                                 |
| AT5G16910 | CSLD2                                                  | (Gu et al., 2016)                                     |
| AT5G17770 | CBR1/CBR                                               | (Kim et al., 2013)                                    |
| AT5G17920 | ATCIMS/ATMETS/ATMS1                                    | (Walton et al., 2016; Romero-Barrios et al., 2020)    |
| AT5G18380 | Ribosomal protein S5 domain 2-like superfamily protein | (Kim et al., 2013)                                    |
| AT5G18610 | PBL27                                                  |                                                       |
| AT5G19600 | SULTR3;5                                               |                                                       |
| AT5G20050 | URK-II family protein                                  |                                                       |
| AT5G20480 | EFR                                                    |                                                       |
| AT5G20650 | COPT5                                                  | (Svozil et al., 2014)                                 |
| AT5G22140 | FAD/NAD(P)-binding oxidoreductase family protein       |                                                       |
| AT5G22740 | ATCSLA02/ATCSLA2                                       |                                                       |
| AT5G26850 | Uncharacterized protein                                |                                                       |
| AT5G27350 | SFP1                                                   |                                                       |

Grubb LE et al. Supplemental Table S4.

|           |                                                   |                                                                                   |
|-----------|---------------------------------------------------|-----------------------------------------------------------------------------------|
| AT5G27930 | Protein phosphatase 2C family protein             |                                                                                   |
| AT5G35200 | ENTH/ANTH/VHS superfamily protein                 |                                                                                   |
| AT5G38480 | GRF3/RC1                                          | (Sato et al., 2011; Kim et al., 2013; Johnson and Vert, 2016)                     |
| AT5G38895 | RING/U-box superfamily protein                    |                                                                                   |
| AT5G38990 | MDS1                                              |                                                                                   |
| AT5G39040 | ALS1/TAP2                                         |                                                                                   |
| AT5G39320 | UDP-glucose 6-dehydrogenase family protein        | (Svozil et al., 2014)                                                             |
| AT5G39510 | VTI11/ZIG/SGR4                                    | (Walton et al., 2016)                                                             |
| AT5G40420 | OLEO2/OLE2                                        | (Deruyffelaere et al., 2015)                                                      |
| AT5G41520 | RNA binding Plectin/S10 domain-containing protein | (Svozil et al., 2014)                                                             |
| AT5G42440 | LRR-Xb family protein                             |                                                                                   |
| AT5G42980 | ATTRX3/ATH3                                       |                                                                                   |
| AT5G43350 | ATPT1/PHT1;1                                      | (Huang et al., 2013; Lin et al., 2013; Park et al., 2014; Johnson and Vert, 2016) |
| AT5G43360 | PHT3/ATPT4/PHT1;3                                 | (Huang et al., 2013; Lin et al., 2013; Park et al., 2014)                         |
| AT5G43860 | CLH2                                              |                                                                                   |
| AT5G44790 | RAN1/HMA7                                         |                                                                                   |
| AT5G46050 | PTR3                                              |                                                                                   |
| AT5G46080 | Protein kinase superfamily protein                |                                                                                   |
| AT5G46330 | FLS2                                              | (Lu et al., 2011)                                                                 |
| AT5G46860 | VAM3/SYP22/SGR3                                   |                                                                                   |
| AT5G47020 | Unknown protein                                   |                                                                                   |
| AT5G47120 | ATBI-1                                            |                                                                                   |
| AT5G47200 | ATRABD2B/ATRAB1A                                  |                                                                                   |

Grubb LE et al. Supplemental Table S4.

|           |                                                                      |                                                                                                    |
|-----------|----------------------------------------------------------------------|----------------------------------------------------------------------------------------------------|
| AT5G47910 | RBOHD                                                                | (Walton et al., 2016; Lee et al., 2020)                                                            |
| AT5G48380 | BIR1                                                                 |                                                                                                    |
| AT5G48810 | ATB5-B/CB5-D                                                         | (Svozil et al., 2014)                                                                              |
| AT5G49760 | HPCA                                                                 |                                                                                                    |
| AT5G50780 | AtMORC4                                                              |                                                                                                    |
| AT5G52240 | MSBP1/ATMP1/AtMAPR5                                                  | (Kao et al., 2012; Svozil et al., 2014)                                                            |
| AT5G52650 | RNA binding Plectin/S10 domain-containing protein                    | (Svozil et al., 2014; Walton et al., 2016)                                                         |
| AT5G53050 | alpha/beta-Hydrolases superfamily protein                            |                                                                                                    |
| AT5G53560 | ATB5-A/ATCB5-E                                                       | (Saracco et al., 2009; Walton et al., 2016)                                                        |
| AT5G54170 | Polyketide cyclase/dehydrase and lipid transport superfamily protein |                                                                                                    |
| AT5G54380 | THE1                                                                 | (Kim et al., 2013)                                                                                 |
| AT5G55160 | SUMO2                                                                |                                                                                                    |
| AT5G55630 | KCO1/TPK1                                                            |                                                                                                    |
| AT5G55990 | CBL2                                                                 |                                                                                                    |
| AT5G56030 | HSP81-2/ERD8/HSP90.2                                                 | (Kim et al., 2013; Aguilar-Hernández et al., 2017)                                                 |
| AT5G56500 | TCP-1/cpn60 chaperonin family protein                                |                                                                                                    |
| AT5G57090 | PIN2/EIR1/WAV6/AGR1                                                  | (Abas et al., 2006; Titapiwatanakun, 2008; Thomann et al., 2009; Titapiwatanakun and Murphy, 2009) |
| AT5G57350 | AHA3                                                                 | (Kim et al., 2013; Walton et al., 2016; Romero-Barrios et al., 2020)                               |
| AT5G58970 | UCP2                                                                 |                                                                                                    |
| AT5G59910 | HTB4                                                                 | (Bergmüller et al., 2007; Romero-Barrios et al., 2020)                                             |
| AT5G61910 | DCD (Development and Cell Death) domain protein                      |                                                                                                    |

|           |                                                 |                                                                      |
|-----------|-------------------------------------------------|----------------------------------------------------------------------|
| AT5G62390 | BAG7                                            | (Kim et al., 2013; Walton et al., 2016; Romero-Barrios et al., 2020) |
| AT5G62520 | SRO5                                            |                                                                      |
| AT5G62670 | AHA11                                           | (Kim et al., 2013; Romero-Barrios et al., 2020)                      |
| AT5G62680 | Major facilitator superfamily protein           |                                                                      |
| AT5G62740 | HIR1                                            | (Johnson and Vert, 2016; Romero-Barrios et al., 2020)                |
| AT5G63410 | LRR-VI family protein kinase                    |                                                                      |
| AT5G64120 | Peroxidase superfamily protein                  |                                                                      |
| AT5G64440 | FAAH                                            |                                                                      |
| AT5G64740 | CESA6/IXR2/E112/PRC1                            | (Taylor, 2007; Watanabe et al., 2018)                                |
| AT5G65660 | Hydroxyproline-rich glycoprotein family protein |                                                                      |
| AT5G65700 | BAM1                                            |                                                                      |
| AT5G66210 | CPK28                                           |                                                                      |
| AT5G66620 | DAR6                                            |                                                                      |

## Supplemental Table S4 References

**Abas L, Benjamins R, Malenica N, Paciorek T, Wiśniewska J, Moulinier-Anzola JC, Sieberer T, Friml J, Luschnig C (2006)** Intracellular trafficking and proteolysis of the Arabidopsis auxin-efflux facilitator PIN2 are involved in root gravitropism. *Nat Cell Biol* **8**: 249–256

**Aguilar-Hernández V, Kim D-Y, Stankey RJ, Scalf M, Smith LM, Vierstra RD (2017)** Mass Spectrometric Analyses Reveal a Central Role for Ubiquitylation in Remodeling the Arabidopsis Proteome during Photomorphogenesis. *Mol Plant* **10**: 846–865



- Benschop JJ, Mohammed S, O’Flaherty M, Heck AJR, Slijper M, Menke FLH** (2007) Quantitative phosphoproteomics of early elicitor signaling in Arabidopsis. *Mol Cell Proteomics* **6**: 1198–1214
- Bergmüller E, Gehrig PM, Gruissem W** (2007) Characterization of post-translational modifications of histone H2B-variants isolated from Arabidopsis thaliana. *J Proteome Res* **6**: 3655–3668
- Dar AA, Choudhury AR, Kancharla PK, Arumugam N** (2017) The FAD2 Gene in Plants: Occurrence, Regulation, and Role. *Front Plant Sci* **8**: 1789
- Deng Z, Oses-Prieto JA, Kutschera U, Tseng T-S, Hao L, Burlingame AL, Wang Z-Y, Briggs WR** (2014) Blue light-induced proteomic changes in etiolated Arabidopsis seedlings. *J Proteome Res* **13**: 2524–2533
- Deruyffelaere C, Bouchez I, Morin H, Guillot A, Miquel M, Froissard M, Chardot T, D’Andrea S** (2015) Ubiquitin-Mediated Proteasomal Degradation of Oleosins is Involved in Oil Body Mobilization During Post-Germinative Seedling Growth in Arabidopsis. *Plant Cell Physiol* **56**: 1374–1387
- Gómez-Zambrano Á, Merini W, Calonje M** (2019) The repressive role of Arabidopsis H2A.Z in transcriptional regulation depends on AtBMI1 activity. *Nature Communications*. doi: 10.1038/s41467-019-10773-1
- Gu F, Bringmann M, Combs J, Yang J, Bergmann D, Nielsen E** (2016) The Arabidopsis CSLD5 functions in cell plate formation in a cell cycle dependent manner. *The Plant Cell* tpc.00203.2016
- Guo H, Nolan TM, Song G, Liu S, Xie Z, Chen J, Schnable PS, Walley JW, Yin Y** (2018) FERONIA Receptor Kinase Contributes to Plant Immunity by Suppressing Jasmonic Acid Signaling in Arabidopsis thaliana. *Curr Biol* **28**: 3316–3324.e6
- Huang T-K, Han C-L, Lin S-I, Chen Y-J, Tsai Y-C, Chen Y-R, Chen J-W, Lin W-Y, Chen P-M, Liu T-Y, et al** (2013) Identification of downstream components of ubiquitin-conjugating enzyme PHOSPHATE2 by quantitative membrane proteomics in Arabidopsis roots. *Plant Cell* **25**: 4044–4060
- Igawa T, Fujiwara M, Takahashi H, Sawasaki T, Endo Y, Seki M, Shinozaki K, Fukao Y, Yanagawa Y** (2009) Isolation and identification of ubiquitin-related proteins from Arabidopsis seedlings. *J Exp Bot* **60**: 3067–3073
- Johnson A, Vert G** (2016) Unraveling K63 Polyubiquitination Networks by Sensor-Based Proteomics. *Plant Physiol* **171**:

1808–1820

- Kao A-L, Lin Y-H, Chen RP-Y, Huang Y-Y, Chen C-C, Yang C-C** (2012) E3-independent ubiquitination of AtMAPR/MSBP1. *Phytochemistry* **78**: 7–19
- Kim D-Y, Scalf M, Smith LM, Vierstra RD** (2013) Advanced proteomic analyses yield a deep catalog of ubiquitylation targets in Arabidopsis. *Plant Cell* **25**: 1523–1540
- Kretschmar FK, Mengel LA, Müller AO, Schmitt K, Biersch KF, Valerius O, Braus GH, Ischebeck T** (2018) PUX10 Is a Lipid Droplet-Localized Scaffold Protein That Interacts with CELL DIVISION CYCLE48 and Is Involved in the Degradation of Lipid Droplet Proteins. *Plant Cell* **30**: 2137–2160
- Lee D, Lal NK, Lin Z-JD, Ma S, Liu J, Castro B, Toruño T, Dinesh-Kumar SP, Coaker G** (2020) Regulation of reactive oxygen species during plant immunity through phosphorylation and ubiquitination of RBOHD. *Nat Commun* **11**: 1838
- Lee HK, Cho SK, Son O, Xu Z, Hwang I, Kim WT** (2009) Drought Stress-Induced Rma1H1, a RING Membrane-Anchored E3 Ubiquitin Ligase Homolog, Regulates Aquaporin Levels via Ubiquitination in Transgenic Arabidopsis Plants. *The Plant Cell* **21**: 622–641
- Ling Q, Huang W, Baldwin A, Jarvis P** (2012) Chloroplast biogenesis is regulated by direct action of the ubiquitin-proteasome system. *Science* **338**: 655–659
- Lin W-Y, Huang T-K, Chiou T-J** (2013) NITROGEN LIMITATION ADAPTATION, a Target of MicroRNA827, Mediates Degradation of Plasma Membrane-Localized Phosphate Transporters to Maintain Phosphate Homeostasis in Arabidopsis. *The Plant Cell* **25**: 4061–4074
- Liu W, Sun Q, Wang K, Du Q, Li W-X** (2017) Nitrogen Limitation Adaptation (NLA) is involved in source-to-sink remobilization of nitrate by mediating the degradation of NRT1.7 in Arabidopsis. *New Phytologist* **214**: 734–744
- Li Z, Shen J, Liang J** (2019) Genome-Wide Identification, Expression Profile, and Alternative Splicing Analysis of the Brassinosteroid-Signaling Kinase (BSK) Family Genes in Arabidopsis. *Int J Mol Sci*. doi: 10.3390/ijms20051138
- Lu D, Lin W, Gao X, Wu S, Cheng C, Avila J, Heese A, Devarenne TP, He P, Shan L** (2011) Direct ubiquitination of pattern

recognition receptor FLS2 attenuates plant innate immunity. *Science* **332**: 1439–1442

**Manzano C, Abraham Z, López-Torrejón G, Del Pozo JC** (2008) Identification of ubiquitinated proteins in Arabidopsis. *Plant Mol Biol* **68**: 145–158

**Maor R, Jones A, Nühse TS, Studholme DJ, Peck SC, Shirasu K** (2007) Multidimensional protein identification technology (MudPIT) analysis of ubiquitinated proteins in plants. *Mol Cell Proteomics* **6**: 601–610

**Ma X, Claus LAN, Leslie ME, Tao K, Wu Z, Liu J, Yu X, Li B, Zhou J, Savatin DV, et al** (2020) Ligand-induced monoubiquitination of BIK1 regulates plant immunity. *Nature* **581**: 199–203

**McNeilly D, Schofield A, Stone SL** (2018) Degradation of the stress-responsive enzyme formate dehydrogenase by the RING-type E3 ligase Keep on Going and the ubiquitin 26S proteasome system. *Plant Mol Biol* **96**: 265–278

**Monaghan J, Matschi S, Shorinola O, Rovenich H, Matei A, Segonzac C, Malinovsky FG, Rathjen JP, MacLean D, Romeis T, et al** (2014) The calcium-dependent protein kinase CPK28 buffers plant immunity and regulates BIK1 turnover. *Cell Host Microbe* **16**: 605–615

**Park BS, Seo JS, Chua N-H** (2014) NITROGEN LIMITATION ADAPTATION recruits PHOSPHATE2 to target the phosphate transporter PT2 for degradation during the regulation of Arabidopsis phosphate homeostasis. *Plant Cell* **26**: 454–464

**Peralta DA, Araya A, Busi MV, Gomez-Casati DF** (2016) The E3 ubiquitin-ligase SEVEN IN ABSENTIA like 7 mono-ubiquitinates glyceraldehyde-3-phosphate dehydrogenase 1 isoform in vitro and is required for its nuclear localization in Arabidopsis thaliana. *Int J Biochem Cell Biol* **70**: 48–56

**Pizzio GA, Hirschi KD, Gaxiola RA** (2017) Conjecture Regarding Posttranslational Modifications to the Arabidopsis Type I Proton-Pumping Pyrophosphatase (AVP1). *Front Plant Sci* **8**: 1572

**Pokotylo I, Kolesnikov Y, Kravets V, Zachowski A, Ruelland E** (2014) Plant phosphoinositide-dependent phospholipases C: variations around a canonical theme. *Biochimie* **96**: 144–157

**Romero-Barrios N, Monachello D, Dolde U, Wong A, San Clemente H, Cayrel A, Johnson A, Lurin C, Vert G** (2020) Advanced Cataloging of Lysine-63 Polyubiquitin Networks by Genomic, Interactome, and Sensor-Based Proteomic Analyses.

Plant Cell **32**: 123–138

**Saracco SA, Hansson M, Scalf M, Walker JM, Smith LM, Vierstra RD** (2009) Tandem affinity purification and mass spectrometric analysis of ubiquitylated proteins in Arabidopsis. *Plant J* **59**: 344–358

**Sato T, Maekawa S, Yasuda S, Domeki Y, Sueyoshi K, Fujiwara M, Fukao Y, Goto DB, Yamaguchi J** (2011) Identification of 14-3-3 proteins as a target of ATL31 ubiquitin ligase, a regulator of the C/N response in Arabidopsis. *The Plant Journal* **68**: 137–146

**Stone SL, Hauksdóttir H, Troy A, Herschleb J, Kraft E, Callis J** (2005) Functional analysis of the RING-type ubiquitin ligase family of Arabidopsis. *Plant Physiol* **137**: 13–30

**Sura W, Kabza M, Karlowski WM, Bieluszewski T, Kus-Slowinska M, Pawełoszek Ł, Sadowski J, Ziolkowski PA** (2017) Dual Role of the Histone Variant H2A.Z in Transcriptional Regulation of Stress-Response Genes. *Plant Cell* **29**: 791–807

**Svozil J, Gruissem W, Baerenfaller K** (2015) Proteasome targeting of proteins in Arabidopsis leaf mesophyll, epidermal and vascular tissues. *Front Plant Sci* **6**: 376

**Svozil J, Hirsch-Hoffmann M, Dudler R, Gruissem W, Baerenfaller K** (2014) Protein abundance changes and ubiquitylation targets identified after inhibition of the proteasome with syringolin A. *Mol Cell Proteomics* **13**: 1523–1536

**Taylor NG** (2007) Identification of cellulose synthase AtCesA7 (IRX3) in vivo phosphorylation sites--a potential role in regulating protein degradation. *Plant Mol Biol* **64**: 161–171

**Thomann A, Lechner E, Hansen M, Dumbliauskas E, Parmentier Y, Kieber J, Scheres B, Genschik P** (2009) Arabidopsis CULLIN3 Genes Regulate Primary Root Growth and Patterning by Ethylene-Dependent and -Independent Mechanisms. *PLoS Genetics* **5**: e1000328

**Till CJ, Vicente J, Zhang H, Oszwald M, Deery MJ, Pastor V, Lilley KS, Ray RV, Theodoulou FL, Holdsworth MJ** (2019) The Arabidopsis thaliana N-recognition E3 ligase PROTEOLYSIS1 influences the immune response. *Plant Direct* **3**: e00194

**Titapiwatanakun B** (2008) The regulation of P-glycoprotein and PIN by their cellular environment. Purdue University

- Titapiwatanakun B, Murphy AS** (2009) Post-transcriptional regulation of auxin transport proteins: cellular trafficking, protein phosphorylation, protein maturation, ubiquitination, and membrane composition. *J Exp Bot* **60**: 1093–1107
- Uhrig RG, She Y-M, Leach CA, Plaxton WC** (2008) Regulatory monoubiquitination of phosphoenolpyruvate carboxylase in germinating castor oil seeds. *J Biol Chem* **283**: 29650–29657
- Walton A, Stes E, Cybulski N, Van Bel M, Inigo S** (2016) It's time for some "site"-seeing: novel tools to monitor the ubiquitin landscape in *Arabidopsis thaliana*. *The Plant*
- Wang J, Grubb LE, Wang J, Liang X, Li L, Gao C, Ma M, Feng F, Li M, Li L, et al** (2018) A Regulatory Module Controlling Homeostasis of a Plant Immune Kinase. *Mol Cell* **69**: 493–504.e6
- Watanabe Y, Schneider R, Barkwill S, Gonzales-Vigil E, Hill JL Jr, Samuels AL, Persson S, Mansfield SD** (2018) Cellulose synthase complexes display distinct dynamic behaviors during xylem transdifferentiation. *Proc Natl Acad Sci U S A* **115**: E6366–E6374
- Xu Q, Yin S, Ma Y, Song M, Song Y, Mu S, Li Y, Liu X, Ren Y, Gao C, et al** (2020) Carbon export from leaves is controlled via ubiquitination and phosphorylation of sucrose transporter SUC2. *Proc Natl Acad Sci U S A* **117**: 6223–6230
- Yamaguchi K, Mezaki H, Fujiwara M, Hara Y, Kawasaki T** (2017) *Arabidopsis* ubiquitin ligase PUB12 interacts with and negatively regulates Chitin Elicitor Receptor Kinase 1 (CERK1). *PLoS One* **12**: e0188886
- Yun HS, Kwaaitaal M, Kato N, Yi C, Park S, Sato MH, Schulze-Lefert P, Kwon C** (2013) Requirement of vesicle-associated membrane protein 721 and 722 for sustained growth during immune responses in *Arabidopsis*. *Mol Cells* **35**: 481–488
- Zhang N, Xu J, Liu X, Liang W, Xin M, Du J, Hu Z, Peng H, Guo W, Ni Z, et al** (2019) Identification of HSP90C as a substrate of E3 ligase TaSAP5 through ubiquitylome profiling. *Plant Sci* **287**: 110170
- Zhou H, Zhao J, Yang Y, Chen C, Liu Y, Jin X, Chen L, Li X, Deng XW, Schumaker KS, et al** (2012) UBIQUITIN-SPECIFIC PROTEASE16 Modulates Salt Tolerance in *Arabidopsis* by Regulating Na<sup>+</sup>/H<sup>+</sup> Antiport Activity and Serine Hydroxymethyltransferase Stability. *The Plant Cell* **24**: 5106–5122
